# Supplementary material for: Inflammasome activation leads to cDC1-independent cross-priming of CD8 T cells by epithelial cell-derived antigen
Source: eLife. 2021 Dec 23;10:e72082. doi: 10.7554/eLife.72082 (PMC8719880; doi:10.7554/eLife.72082)
Supplement: Figure 1—source data 1. [file elife-72082-fig1-data1.xlsx]

## Sheet: B top
	DAY 1										OvaFla+VillinER-Cre+						Gsdmd–OvaFla+VillinER-Cre+						Nlrc4–OvaFla+VillinER-Cre+						OvaFla only			Cre only
	Tukey's multiple comparisons test	Mean Diff.	95.00% CI of diff.	Below threshold?	Summary	Adjusted P Value			Day 0	0	100	100	100	100	100	100	100	100	100	100	100	100	100	100	100	100	100		100	100		100	100	100	100
	OvaFla+VillinER-Cre+ vs. Gsdmd–OvaFla+VillinER-Cre+	-0.9154	-5.134 to 3.303	No	ns	0.9632			Day 1	1	89.1892	88	86.8852	89.6175	85.9813	85.2459	85.1695	89.7541	89.4737	91.133	86.4198	88.4615	99.1304	99.0385	95.3757	94.7368	93.4673		100.549	98.8304		93.9227	100.568	96.988	92.7602
	OvaFla+VillinER-Cre+ vs. Nlrc4–OvaFla+VillinER-Cre+	-8.863	-13.29 to -4.439	Yes	****	<0.0001			Day 2	2	83.2432	81.1429	78.6885	80.8743	79.9065	80.7377	80.9322	82.7869	83.7719	86.2069	85.8025	84.6154	98.6957	98.5577	94.2197	92.6316	86.4322		101.099	97.076		92.8177	98.8636	93.3735	96.3801
	OvaFla+VillinER-Cre+ vs. OvaFla only	-12.2	-18.17 to -6.237	Yes	****	<0.0001
	OvaFla+VillinER-Cre+ vs. Cre only	-8.573	-13.29 to -3.857	Yes	***	0.0003
	Gsdmd–OvaFla+VillinER-Cre+ vs. Nlrc4–OvaFla+VillinER-Cre+	-7.948	-12.37 to -3.523	Yes	***	0.0003
	Gsdmd–OvaFla+VillinER-Cre+ vs. OvaFla only	-11.29	-17.25 to -5.322	Yes	***	0.0002
	Gsdmd–OvaFla+VillinER-Cre+ vs. Cre only	-7.658	-12.37 to -2.941	Yes	***	0.0009
	Nlrc4–OvaFla+VillinER-Cre+ vs. OvaFla only	-3.34	-9.454 to 2.773	No	ns	0.4857
	Nlrc4–OvaFla+VillinER-Cre+ vs. Cre only	0.29	-4.612 to 5.192	No	ns	0.9997
	OvaFla only vs. Cre only	3.63	-2.698 to 9.958	No	ns	0.439
	DAY 2
	Tukey's multiple comparisons test	Mean Diff.	95.00% CI of diff.	Below threshold?	Summary	Adjusted P Value
	OvaFla+VillinER-Cre+ vs. Gsdmd–OvaFla+VillinER-Cre+	-3.254	-8.532 to 2.025	No	ns	0.3704
	OvaFla+VillinER-Cre+ vs. Nlrc4–OvaFla+VillinER-Cre+	-13.34	-18.88 to -7.806	Yes	****	<0.0001
	OvaFla+VillinER-Cre+ vs. OvaFla only	-18.32	-25.79 to -10.86	Yes	****	<0.0001
	OvaFla+VillinER-Cre+ vs. Cre only	-14.59	-20.49 to -8.692	Yes	****	<0.0001
	Gsdmd–OvaFla+VillinER-Cre+ vs. Nlrc4–OvaFla+VillinER-Cre+	-10.09	-15.62 to -4.552	Yes	***	0.0003
	Gsdmd–OvaFla+VillinER-Cre+ vs. OvaFla only	-15.07	-22.53 to -7.603	Yes	****	<0.0001
	Gsdmd–OvaFla+VillinER-Cre+ vs. Cre only	-11.34	-17.24 to -5.438	Yes	***	0.0001
	Nlrc4–OvaFla+VillinER-Cre+ vs. OvaFla only	-4.98	-12.63 to 2.669	No	ns	0.3195
	Nlrc4–OvaFla+VillinER-Cre+ vs. Cre only	-1.251	-7.384 to 4.882	No	ns	0.9705
	OvaFla only vs. Cre only	3.729	-4.189 to 11.65	No	ns	0.621

## Sheet: B bottom
	DAY 1										OvaFla+VillinER-Cre+						Gsdmd–OvaFla+VillinER-Cre+						Nlrc4–OvaFla+VillinER-Cre+						OvaFla only			Cre only
	Tukey's multiple comparisons test	Mean Diff.	95.00% CI of diff.	Below threshold?	Summary	Adjusted P Value			Day 0	0	100	100	100	100	100	100	100	100	100	100	100	100	100	100	100	100	100		100	100		100	100	100	100
	OvaFla+VillinER-Cre+ vs. Gsdmd–OvaFla+VillinER-Cre+	-0.65	-4.090 to 2.790	No	ns	0.9776			Day 1	1	92.9319	94.0104	96.1039	98.6595	98.3471	100.826	96.2667	95.756	97.0899	97.8261	98.6559	99.1848	100.538	99.7275	95.7784	98.153	98.6877		100	100.82		101.07	100	100	101.671
	OvaFla+VillinER-Cre+ vs. Nlrc4–OvaFla+VillinER-Cre+	-1.764	-5.371 to 1.844	No	ns	0.5885			Day 2	2	93.7173	90.3646	92.987	96.2466	97.5207	96.9697	95.2	96.0212	93.6508	92.9348	94.086	95.3804	97.5806	99.455	97.3615	97.3615	96.8504		99.187	101.639		98.9305	100.269	99.4695	99.7214
	OvaFla+VillinER-Cre+ vs. OvaFla only	-3.597	-8.461 to 1.268	No	ns	0.2115
	OvaFla+VillinER-Cre+ vs. Cre only	-3.872	-7.718 to -0.02614	Yes	*	0.048
	Gsdmd–OvaFla+VillinER-Cre+ vs. Nlrc4–OvaFla+VillinER-Cre+	-1.114	-4.721 to 2.494	No	ns	0.8802
	Gsdmd–OvaFla+VillinER-Cre+ vs. OvaFla only	-2.947	-7.811 to 1.918	No	ns	0.387
	Gsdmd–OvaFla+VillinER-Cre+ vs. Cre only	-3.222	-7.068 to 0.6239	No	ns	0.1268
	Nlrc4–OvaFla+VillinER-Cre+ vs. OvaFla only	-1.833	-6.818 to 3.152	No	ns	0.7983
	Nlrc4–OvaFla+VillinER-Cre+ vs. Cre only	-2.108	-6.105 to 1.888	No	ns	0.5188
	OvaFla only vs. Cre only	-0.2754	-5.435 to 4.884	No	ns	0.9998
	DAY 2
	Šídák's multiple comparisons test	Mean Diff.	95.00% CI of diff.	Below threshold?	Summary	Adjusted P Value
	OvaFla+VillinER-Cre+ vs. Gsdmd–OvaFla+VillinER-Cre+	0.08877	-3.069 to 3.247	No	ns	>0.9999
	OvaFla+VillinER-Cre+ vs. Nlrc4–OvaFla+VillinER-Cre+	-3.087	-6.400 to 0.2248	No	ns	0.0791
	OvaFla+VillinER-Cre+ vs. OvaFla only	-5.779	-10.25 to -1.313	Yes	**	0.0064
	OvaFla+VillinER-Cre+ vs. Cre only	-4.963	-8.494 to -1.432	Yes	**	0.0029
	Gsdmd–OvaFla+VillinER-Cre+ vs. Nlrc4–OvaFla+VillinER-Cre+	-3.176	-6.489 to 0.1360	No	ns	0.0661
	Gsdmd–OvaFla+VillinER-Cre+ vs. OvaFla only	-5.868	-10.33 to -1.401	Yes	**	0.0055
	Gsdmd–OvaFla+VillinER-Cre+ vs. Cre only	-5.052	-8.583 to -1.521	Yes	**	0.0024
	Nlrc4–OvaFla+VillinER-Cre+ vs. OvaFla only	-2.691	-7.268 to 1.885	No	ns	0.5527
	Nlrc4–OvaFla+VillinER-Cre+ vs. Cre only	-1.876	-5.545 to 1.794	No	ns	0.7239
	OvaFla only vs. Cre only	0.8156	-3.922 to 5.553	No	ns	0.9999

## Sheet: C
	Tukey's multiple comparisons test	Mean Diff.	95.00% CI of diff.	Below threshold?	Summary	Adjusted P Value
	OvaFla+VillinER-Cre+ vs. Gsdmd–OvaFla+VillinER-Cre+	60.96	53.48 to 68.43	Yes	****	<0.0001
	OvaFla+VillinER-Cre+ vs. Nlrc4–OvaFla+VillinER-Cre+	63.31	55.47 to 71.15	Yes	****	<0.0001
	OvaFla+VillinER-Cre+ vs. OvaFla only	63.31	52.74 to 73.88	Yes	****	<0.0001
	OvaFla+VillinER-Cre+ vs. Cre only	63.28	54.92 to 71.64	Yes	****	<0.0001
	Gsdmd–OvaFla+VillinER-Cre+ vs. Nlrc4–OvaFla+VillinER-Cre+	2.354	-5.488 to 10.20	No	ns	0.8903
	Gsdmd–OvaFla+VillinER-Cre+ vs. OvaFla only	2.354	-8.220 to 12.93	No	ns	0.9598
	Gsdmd–OvaFla+VillinER-Cre+ vs. Cre only	2.325	-6.035 to 10.68	No	ns	0.9142
	Nlrc4–OvaFla+VillinER-Cre+ vs. OvaFla only	0	-10.84 to 10.84	No	ns	>0.9999
	Nlrc4–OvaFla+VillinER-Cre+ vs. Cre only	-0.02898	-8.716 to 8.658	No	ns	>0.9999
	OvaFla only vs. Cre only	-0.02898	-11.24 to 11.19	No	ns	>0.9999

## Sheet: D top
	DAY 1
	Tukey's multiple comparisons test	Mean Diff.	95.00% CI of diff.	Below threshold?	Summary	Adjusted P Value					OvaFla+VillinER-Cre+						Pycard–/–OvaFla+VillinER-Cre+						Gsdmd–OvaFla+VillinER-Cre+						Nlrc4–OvaFla+VillinER-Cre+						OvaFla only						Cre only
	OvaFla+VillinER-Cre+ vs. Pycard–/–OvaFla+VillinER-Cre+	-2.221	-7.600 to 3.157	No	ns	0.7746			Day 0	0	100	100	100	100	100	100	100	100	100	100	100		100	100	100	100			100	100	100				100	100	100	100	100		100	100
	OvaFla+VillinER-Cre+ vs. Gsdmd–OvaFla+VillinER-Cre+	-2.48	-8.760 to 3.800	No	ns	0.8045			Day 1	1	86.25	85.7143	91.453	85.514	87.6238	89.1892	88.0342	93.7759	89.7638	87.766	89.8876		85.7143	95.0739		89.5238			93.1452	97.2222	97.1591				96.9543	96.8504	99.4709	94.3231	100		93.1818	98.5222
	OvaFla+VillinER-Cre+ vs. Nlrc4–OvaFla+VillinER-Cre+	-8.218	-14.50 to -1.938	Yes	**	0.0066			Day 2	2	93.3333	96.3265	96.1538	97.1963	98.5149	95.6757	100.855	95.8506	102.362	101.064	97.191		97.0443	102.956	99.5025	97.1429			101.613	99.537	102.841				100.508	101.181	100.529	98.2533	101.676		102.652	99.0148
	OvaFla+VillinER-Cre+ vs. OvaFla only	-9.896	-15.27 to -4.518	Yes	***	0.0002			Day 3	3	96.6667	97.9592	97.0085	100.935	100.495	100.541	101.709	96.6805	103.15	101.596	99.4382		97.0443	102.463	102.488				100	103.704	100				98.4772	102.756	100.529	100.873	99.4413		103.03	99.5074
	OvaFla+VillinER-Cre+ vs. Cre only	-8.228	-15.48 to -0.9762	Yes	*	0.021			Day 4	4	95.8333	99.1837	98.7179	99.5327	103.465	100.541	101.709	97.0954	106.693	103.191	103.933		99.5074	104.433	101.99	100.952			100.806	103.241	100.568				99.4924	102.362	101.058	102.62	99.4413		102.652	99.5074
	Pycard–/–OvaFla+VillinER-Cre+ vs. Gsdmd–OvaFla+VillinER-Cre+	-0.2585	-6.745 to 6.228	No	ns	>0.9999			Day 5	5	96.25	104.898	103.846	100	103.96	100	103.419	99.5851	105.512	104.787	105.618		100.493	105.419	100	101.905			100.806	102.778	103.977				99.4924	101.181	102.646	102.183	100.559		102.273	98.5222
	Pycard–/–OvaFla+VillinER-Cre+ vs. Nlrc4–OvaFla+VillinER-Cre+	-5.997	-12.48 to 0.4895	No	ns	0.0796
	Pycard–/–OvaFla+VillinER-Cre+ vs. OvaFla only	-7.674	-13.29 to -2.057	Yes	**	0.0045
	Pycard–/–OvaFla+VillinER-Cre+ vs. Cre only	-6.006	-13.44 to 1.424	No	ns	0.1562
	Gsdmd–OvaFla+VillinER-Cre+ vs. Nlrc4–OvaFla+VillinER-Cre+	-5.738	-12.99 to 1.514	No	ns	0.1715
	Gsdmd–OvaFla+VillinER-Cre+ vs. OvaFla only	-7.416	-13.90 to -0.9296	Yes	*	0.0199
	Gsdmd–OvaFla+VillinER-Cre+ vs. Cre only	-5.748	-13.86 to 2.360	No	ns	0.2627
	Nlrc4–OvaFla+VillinER-Cre+ vs. OvaFla only	-1.678	-8.164 to 4.809	No	ns	0.9595
	Nlrc4–OvaFla+VillinER-Cre+ vs. Cre only	-0.009835	-8.118 to 8.098	No	ns	>0.9999
	OvaFla only vs. Cre only	1.668	-5.763 to 9.099	No	ns	0.9778
	DAY 2
	Tukey's multiple comparisons test	Mean Diff.	95.00% CI of diff.	Below threshold?	Summary	Adjusted P Value
	OvaFla+VillinER-Cre+ vs. Pycard–/–OvaFla+VillinER-Cre+	-3.264	-7.385 to 0.8557	No	ns	0.1723
	OvaFla+VillinER-Cre+ vs. Gsdmd–OvaFla+VillinER-Cre+	-2.961	-7.353 to 1.431	No	ns	0.314
	OvaFla+VillinER-Cre+ vs. Nlrc4–OvaFla+VillinER-Cre+	-5.13	-9.941 to -0.3189	Yes	*	0.0326
	OvaFla+VillinER-Cre+ vs. OvaFla only	-4.229	-8.349 to -0.1092	Yes	*	0.0422
	OvaFla+VillinER-Cre+ vs. Cre only	-4.633	-10.19 to 0.9225	No	ns	0.1366
	Pycard–/–OvaFla+VillinER-Cre+ vs. Gsdmd–OvaFla+VillinER-Cre+	0.3031	-4.261 to 4.868	No	ns	>0.9999
	Pycard–/–OvaFla+VillinER-Cre+ vs. Nlrc4–OvaFla+VillinER-Cre+	-1.866	-6.835 to 3.103	No	ns	0.8378
	Pycard–/–OvaFla+VillinER-Cre+ vs. OvaFla only	-0.9649	-5.268 to 3.338	No	ns	0.9786
	Pycard–/–OvaFla+VillinER-Cre+ vs. Cre only	-1.369	-7.061 to 4.324	No	ns	0.9711
	Gsdmd–OvaFla+VillinER-Cre+ vs. Nlrc4–OvaFla+VillinER-Cre+	-2.169	-7.366 to 3.028	No	ns	0.7715
	Gsdmd–OvaFla+VillinER-Cre+ vs. OvaFla only	-1.268	-5.832 to 3.296	No	ns	0.9473
	Gsdmd–OvaFla+VillinER-Cre+ vs. Cre only	-1.672	-7.564 to 4.221	No	ns	0.9427
	Nlrc4–OvaFla+VillinER-Cre+ vs. OvaFla only	0.9009	-4.068 to 5.870	No	ns	0.9917
	Nlrc4–OvaFla+VillinER-Cre+ vs. Cre only	0.4971	-5.714 to 6.708	No	ns	0.9998
	OvaFla only vs. Cre only	-0.4037	-6.096 to 5.289	No	ns	>0.9999
	DAY 3
	Tukey's multiple comparisons test	Mean Diff.	95.00% CI of diff.	Below threshold?	Summary	Adjusted P Value
	OvaFla+VillinER-Cre+ vs. Pycard–/–OvaFla+VillinER-Cre+	-1.581	-5.875 to 2.714	No	ns	0.8452
	OvaFla+VillinER-Cre+ vs. Gsdmd–OvaFla+VillinER-Cre+	-1.731	-6.746 to 3.284	No	ns	0.8763
	OvaFla+VillinER-Cre+ vs. Nlrc4–OvaFla+VillinER-Cre+	-2.3	-7.315 to 2.714	No	ns	0.6933
	OvaFla+VillinER-Cre+ vs. OvaFla only	-1.481	-5.776 to 2.813	No	ns	0.8766
	OvaFla+VillinER-Cre+ vs. Cre only	-2.335	-8.125 to 3.456	No	ns	0.791
	Pycard–/–OvaFla+VillinER-Cre+ vs. Gsdmd–OvaFla+VillinER-Cre+	-0.1503	-5.330 to 5.029	No	ns	>0.9999
	Pycard–/–OvaFla+VillinER-Cre+ vs. Nlrc4–OvaFla+VillinER-Cre+	-0.7199	-5.899 to 4.459	No	ns	0.9975
	Pycard–/–OvaFla+VillinER-Cre+ vs. OvaFla only	0.09932	-4.386 to 4.585	No	ns	>0.9999
	Pycard–/–OvaFla+VillinER-Cre+ vs. Cre only	-0.7542	-6.688 to 5.179	No	ns	0.9984
	Gsdmd–OvaFla+VillinER-Cre+ vs. Nlrc4–OvaFla+VillinER-Cre+	-0.5696	-6.360 to 5.221	No	ns	0.9995
	Gsdmd–OvaFla+VillinER-Cre+ vs. OvaFla only	0.2496	-4.930 to 5.429	No	ns	>0.9999
	Gsdmd–OvaFla+VillinER-Cre+ vs. Cre only	-0.6039	-7.078 to 5.870	No	ns	0.9996
	Nlrc4–OvaFla+VillinER-Cre+ vs. OvaFla only	0.8192	-4.360 to 5.998	No	ns	0.9954
	Nlrc4–OvaFla+VillinER-Cre+ vs. Cre only	-0.03428	-6.508 to 6.440	No	ns	>0.9999
	OvaFla only vs. Cre only	-0.8535	-6.787 to 5.080	No	ns	0.9971
	DAY 4
	Tukey's multiple comparisons test	Mean Diff.	95.00% CI of diff.	Below threshold?	Summary	Adjusted P Value
	OvaFla+VillinER-Cre+ vs. Pycard–/–OvaFla+VillinER-Cre+	-2.979	-7.631 to 1.673	No	ns	0.3661
	OvaFla+VillinER-Cre+ vs. Gsdmd–OvaFla+VillinER-Cre+	-2.175	-7.134 to 2.784	No	ns	0.7345
	OvaFla+VillinER-Cre+ vs. Nlrc4–OvaFla+VillinER-Cre+	-1.993	-7.425 to 3.439	No	ns	0.8502
	OvaFla+VillinER-Cre+ vs. OvaFla only	-1.449	-6.101 to 3.203	No	ns	0.9174
	OvaFla+VillinER-Cre+ vs. Cre only	-1.534	-7.806 to 4.739	No	ns	0.9689
	Pycard–/–OvaFla+VillinER-Cre+ vs. Gsdmd–OvaFla+VillinER-Cre+	0.8035	-4.350 to 5.957	No	ns	0.9959
	Pycard–/–OvaFla+VillinER-Cre+ vs. Nlrc4–OvaFla+VillinER-Cre+	0.9859	-4.624 to 6.596	No	ns	0.9928
	Pycard–/–OvaFla+VillinER-Cre+ vs. OvaFla only	1.53	-3.329 to 6.388	No	ns	0.914
	Pycard–/–OvaFla+VillinER-Cre+ vs. Cre only	1.445	-4.983 to 7.872	No	ns	0.9783
	Gsdmd–OvaFla+VillinER-Cre+ vs. Nlrc4–OvaFla+VillinER-Cre+	0.1824	-5.685 to 6.050	No	ns	>0.9999
	Gsdmd–OvaFla+VillinER-Cre+ vs. OvaFla only	0.726	-4.427 to 5.879	No	ns	0.9974
	Gsdmd–OvaFla+VillinER-Cre+ vs. Cre only	0.6414	-6.012 to 7.294	No	ns	0.9996
	Nlrc4–OvaFla+VillinER-Cre+ vs. OvaFla only	0.5436	-5.067 to 6.154	No	ns	0.9996
	Nlrc4–OvaFla+VillinER-Cre+ vs. Cre only	0.459	-6.554 to 7.472	No	ns	>0.9999
	OvaFla only vs. Cre only	-0.08461	-6.512 to 6.343	No	ns	>0.9999
	DAY 5
	Tukey's multiple comparisons test	Mean Diff.	95.00% CI of diff.	Below threshold?	Summary	Adjusted P Value
	OvaFla+VillinER-Cre+ vs. Pycard–/–OvaFla+VillinER-Cre+	-2.292	-7.035 to 2.452	No	ns	0.6525
	OvaFla+VillinER-Cre+ vs. Gsdmd–OvaFla+VillinER-Cre+	-0.4616	-5.518 to 4.595	No	ns	0.9997
	OvaFla+VillinER-Cre+ vs. Nlrc4–OvaFla+VillinER-Cre+	-1.028	-6.567 to 4.511	No	ns	0.9908
	OvaFla+VillinER-Cre+ vs. OvaFla only	0.2802	-4.463 to 5.024	No	ns	>0.9999
	OvaFla+VillinER-Cre+ vs. Cre only	1.095	-5.301 to 7.491	No	ns	0.9936
	Pycard–/–OvaFla+VillinER-Cre+ vs. Gsdmd–OvaFla+VillinER-Cre+	1.83	-3.425 to 7.085	No	ns	0.8752
	Pycard–/–OvaFla+VillinER-Cre+ vs. Nlrc4–OvaFla+VillinER-Cre+	1.264	-4.457 to 6.985	No	ns	0.9799
	Pycard–/–OvaFla+VillinER-Cre+ vs. OvaFla only	2.572	-2.383 to 7.526	No	ns	0.5839
	Pycard–/–OvaFla+VillinER-Cre+ vs. Cre only	3.387	-3.167 to 9.941	No	ns	0.5885
	Gsdmd–OvaFla+VillinER-Cre+ vs. Nlrc4–OvaFla+VillinER-Cre+	-0.5665	-6.550 to 5.417	No	ns	0.9996
	Gsdmd–OvaFla+VillinER-Cre+ vs. OvaFla only	0.7418	-4.513 to 5.997	No	ns	0.9974
	Gsdmd–OvaFla+VillinER-Cre+ vs. Cre only	1.557	-5.228 to 8.341	No	ns	0.9763
	Nlrc4–OvaFla+VillinER-Cre+ vs. OvaFla only	1.308	-4.413 to 7.029	No	ns	0.9767
	Nlrc4–OvaFla+VillinER-Cre+ vs. Cre only	2.123	-5.028 to 9.274	No	ns	0.9314
	OvaFla only vs. Cre only	0.8148	-5.739 to 7.369	No	ns	0.9986

## Sheet: D bottom
	DAY 1
	Tukey's multiple comparisons test	Mean Diff.	95.00% CI of diff.	Below threshold?	Summary	Adjusted P Value					OvaFla+VillinER-Cre+						Pycard–/–OvaFla+VillinER-Cre+						Gsdmd–OvaFla+VillinER-Cre+						Nlrc4–OvaFla+VillinER-Cre+						OvaFla only						Cre only
	OvaFla+VillinER-Cre+ vs. Pycard–/–OvaFla+VillinER-Cre+	-2.546	-6.242 to 1.150	No	ns	0.2929			Day 0	0	100	100	100	100	100	100	100	100	100	100	100		100	100	100	100			100	100	100				100	100	100	100	100		100	100
	OvaFla+VillinER-Cre+ vs. Gsdmd–OvaFla+VillinER-Cre+	-2.5	-6.439 to 1.440	No	ns	0.3756			Day 1	1	96.0526	93.3862	97.5936	97.0976	98.1333	98.9418	100.274	100.82	99.4505	99.1914	97.3333		96.8254	102.725	97.3822	100.536			102.151	100	97.644				97.3475	98.6631	97.6562	97.6064	98.6877		95.0521	99.4609
	OvaFla+VillinER-Cre+ vs. Nlrc4–OvaFla+VillinER-Cre+	-3.064	-7.380 to 1.252	No	ns	0.2645			Day 2	2	98.1579	99.2063	97.861	98.9446	100.8	98.6772	101.918	101.913	104.67	99.7305	100.8		100.794	101.09	99.7382	102.413			102.419	101.918	97.9058				100	101.337	101.302	101.064	99.4751		98.6979	100
	OvaFla+VillinER-Cre+ vs. OvaFla only	-1.125	-4.820 to 2.571	No	ns	0.9245			Day 3	3	97.6316	100	98.6631	98.153	101.067	99.4709	101.096	100.82	103.022	99.4609	99.2		98.4127	100.817	97.3822	102.681			101.882	99.726	98.1675				99.4695	101.337	97.9167	98.6702	98.4252		97.9167	101.348
	OvaFla+VillinER-Cre+ vs. Cre only	-0.389	-5.372 to 4.595	No	ns	0.9999			Day 4	4	99.2105	99.2063	98.6631	101.319	100	100.265	101.918	99.1803	100	103.235	98.9333		100.265	100	97.9058	100.536			100.269	101.918	97.3822				98.1432	102.406	96.875	100.798	97.6378		99.2188	101.617
	Pycard–/–OvaFla+VillinER-Cre+ vs. Gsdmd–OvaFla+VillinER-Cre+	0.04663	-4.048 to 4.141	No	ns	>0.9999			Day 5	5	96.5789	96.0317	98.6631	98.6807	100.267	98.1481	101.096	101.913	101.923	100.809	99.7333		100.794	100.817	99.2147	102.681			98.3871	101.918	98.6911				98.939	98.3957	96.3542	100.266	98.6877		99.2188	101.078
	Pycard–/–OvaFla+VillinER-Cre+ vs. Nlrc4–OvaFla+VillinER-Cre+	-0.5177	-4.975 to 3.940	No	ns	0.999
	Pycard–/–OvaFla+VillinER-Cre+ vs. OvaFla only	1.422	-2.439 to 5.282	No	ns	0.8482
	Pycard–/–OvaFla+VillinER-Cre+ vs. Cre only	2.157	-2.949 to 7.264	No	ns	0.7629
	Gsdmd–OvaFla+VillinER-Cre+ vs. Nlrc4–OvaFla+VillinER-Cre+	-0.5644	-5.226 to 4.097	No	ns	0.9988
	Gsdmd–OvaFla+VillinER-Cre+ vs. OvaFla only	1.375	-2.719 to 5.469	No	ns	0.8906
	Gsdmd–OvaFla+VillinER-Cre+ vs. Cre only	2.111	-3.175 to 7.396	No	ns	0.8013
	Nlrc4–OvaFla+VillinER-Cre+ vs. OvaFla only	1.939	-2.518 to 6.397	No	ns	0.7409
	Nlrc4–OvaFla+VillinER-Cre+ vs. Cre only	2.675	-2.897 to 8.247	No	ns	0.6582
	OvaFla only vs. Cre only	0.7357	-4.371 to 5.842	No	ns	0.9971
	DAY 2
	Tukey's multiple comparisons test	Mean Diff.	95.00% CI of diff.	Below threshold?	Summary	Adjusted P Value
	OvaFla+VillinER-Cre+ vs. Pycard–/–OvaFla+VillinER-Cre+	-2.865	-5.589 to -0.1408	Yes	*	0.0359
	OvaFla+VillinER-Cre+ vs. Gsdmd–OvaFla+VillinER-Cre+	-2.067	-4.972 to 0.8366	No	ns	0.2619
	OvaFla+VillinER-Cre+ vs. Nlrc4–OvaFla+VillinER-Cre+	-1.806	-4.988 to 1.375	No	ns	0.4921
	OvaFla+VillinER-Cre+ vs. OvaFla only	-1.694	-4.419 to 1.030	No	ns	0.3963
	OvaFla+VillinER-Cre+ vs. Cre only	-0.4078	-4.081 to 3.266	No	ns	0.9992
	Pycard–/–OvaFla+VillinER-Cre+ vs. Gsdmd–OvaFla+VillinER-Cre+	0.7976	-2.220 to 3.816	No	ns	0.957
	Pycard–/–OvaFla+VillinER-Cre+ vs. Nlrc4–OvaFla+VillinER-Cre+	1.059	-2.227 to 4.344	No	ns	0.9061
	Pycard–/–OvaFla+VillinER-Cre+ vs. OvaFla only	1.171	-1.675 to 4.016	No	ns	0.7815
	Pycard–/–OvaFla+VillinER-Cre+ vs. Cre only	2.457	-1.307 to 6.221	No	ns	0.3463
	Gsdmd–OvaFla+VillinER-Cre+ vs. Nlrc4–OvaFla+VillinER-Cre+	0.261	-3.175 to 3.697	No	ns	0.9999
	Gsdmd–OvaFla+VillinER-Cre+ vs. OvaFla only	0.3731	-2.645 to 3.391	No	ns	0.9986
	Gsdmd–OvaFla+VillinER-Cre+ vs. Cre only	1.66	-2.237 to 5.556	No	ns	0.7568
	Nlrc4–OvaFla+VillinER-Cre+ vs. OvaFla only	0.1121	-3.174 to 3.398	No	ns	>0.9999
	Nlrc4–OvaFla+VillinER-Cre+ vs. Cre only	1.399	-2.708 to 5.506	No	ns	0.8849
	OvaFla only vs. Cre only	1.287	-2.477 to 5.051	No	ns	0.8833
	DAY 3
	Tukey's multiple comparisons test	Mean Diff.	95.00% CI of diff.	Below threshold?	Summary	Adjusted P Value
	OvaFla+VillinER-Cre+ vs. Pycard–/–OvaFla+VillinER-Cre+	-1.555	-4.796 to 1.685	No	ns	0.6583
	OvaFla+VillinER-Cre+ vs. Gsdmd–OvaFla+VillinER-Cre+	-0.6591	-4.113 to 2.795	No	ns	0.9895
	OvaFla+VillinER-Cre+ vs. Nlrc4–OvaFla+VillinER-Cre+	-0.7609	-4.544 to 3.023	No	ns	0.9867
	OvaFla+VillinER-Cre+ vs. OvaFla only	0.0005195	-3.240 to 3.241	No	ns	>0.9999
	OvaFla+VillinER-Cre+ vs. Cre only	-0.468	-4.837 to 3.901	No	ns	0.9993
	Pycard–/–OvaFla+VillinER-Cre+ vs. Gsdmd–OvaFla+VillinER-Cre+	0.8964	-2.693 to 4.486	No	ns	0.9661
	Pycard–/–OvaFla+VillinER-Cre+ vs. Nlrc4–OvaFla+VillinER-Cre+	0.7946	-3.113 to 4.702	No	ns	0.9861
	Pycard–/–OvaFla+VillinER-Cre+ vs. OvaFla only	1.556	-1.828 to 4.940	No	ns	0.6962
	Pycard–/–OvaFla+VillinER-Cre+ vs. Cre only	1.088	-3.389 to 5.564	No	ns	0.9698
	Gsdmd–OvaFla+VillinER-Cre+ vs. Nlrc4–OvaFla+VillinER-Cre+	-0.1018	-4.188 to 3.985	No	ns	>0.9999
	Gsdmd–OvaFla+VillinER-Cre+ vs. OvaFla only	0.6596	-2.930 to 4.249	No	ns	0.9912
	Gsdmd–OvaFla+VillinER-Cre+ vs. Cre only	0.1911	-4.443 to 4.825	No	ns	>0.9999
	Nlrc4–OvaFla+VillinER-Cre+ vs. OvaFla only	0.7614	-3.146 to 4.669	No	ns	0.9885
	Nlrc4–OvaFla+VillinER-Cre+ vs. Cre only	0.2929	-4.592 to 5.177	No	ns	>0.9999
	OvaFla only vs. Cre only	-0.4685	-4.945 to 4.008	No	ns	0.9994
	DAY 4
	Tukey's multiple comparisons test	Mean Diff.	95.00% CI of diff.	Below threshold?	Summary	Adjusted P Value
	OvaFla+VillinER-Cre+ vs. Pycard–/–OvaFla+VillinER-Cre+	-0.8759	-4.216 to 2.464	No	ns	0.9584
	OvaFla+VillinER-Cre+ vs. Gsdmd–OvaFla+VillinER-Cre+	0.1007	-3.460 to 3.661	No	ns	>0.9999
	OvaFla+VillinER-Cre+ vs. Nlrc4–OvaFla+VillinER-Cre+	-0.07898	-3.979 to 3.821	No	ns	>0.9999
	OvaFla+VillinER-Cre+ vs. OvaFla only	0.6052	-2.735 to 3.945	No	ns	0.9917
	OvaFla+VillinER-Cre+ vs. Cre only	-0.6407	-5.145 to 3.863	No	ns	0.9973
	Pycard–/–OvaFla+VillinER-Cre+ vs. Gsdmd–OvaFla+VillinER-Cre+	0.9766	-2.724 to 4.677	No	ns	0.9573
	Pycard–/–OvaFla+VillinER-Cre+ vs. Nlrc4–OvaFla+VillinER-Cre+	0.7969	-3.231 to 4.825	No	ns	0.9877
	Pycard–/–OvaFla+VillinER-Cre+ vs. OvaFla only	1.481	-2.008 to 4.970	No	ns	0.7592
	Pycard–/–OvaFla+VillinER-Cre+ vs. Cre only	0.2352	-4.380 to 4.850	No	ns	>0.9999
	Gsdmd–OvaFla+VillinER-Cre+ vs. Nlrc4–OvaFla+VillinER-Cre+	-0.1796	-4.393 to 4.033	No	ns	>0.9999
	Gsdmd–OvaFla+VillinER-Cre+ vs. OvaFla only	0.5046	-3.196 to 4.205	No	ns	0.9978
	Gsdmd–OvaFla+VillinER-Cre+ vs. Cre only	-0.7414	-5.518 to 4.036	No	ns	0.996
	Nlrc4–OvaFla+VillinER-Cre+ vs. OvaFla only	0.6842	-3.344 to 4.713	No	ns	0.9938
	Nlrc4–OvaFla+VillinER-Cre+ vs. Cre only	-0.5617	-5.597 to 4.474	No	ns	0.9992
	OvaFla only vs. Cre only	-1.246	-5.861 to 3.369	No	ns	0.9531
	DAY 5
	Tukey's multiple comparisons test	Mean Diff.	95.00% CI of diff.	Below threshold?	Summary	Adjusted P Value
	OvaFla+VillinER-Cre+ vs. Pycard–/–OvaFla+VillinER-Cre+	-3.033	-5.760 to -0.3062	Yes	*	0.0241
	OvaFla+VillinER-Cre+ vs. Gsdmd–OvaFla+VillinER-Cre+	-2.815	-5.722 to 0.09176	No	ns	0.061
	OvaFla+VillinER-Cre+ vs. Nlrc4–OvaFla+VillinER-Cre+	-1.604	-4.788 to 1.581	No	ns	0.6135
	OvaFla+VillinER-Cre+ vs. OvaFla only	-0.4669	-3.194 to 2.260	No	ns	0.9936
	OvaFla+VillinER-Cre+ vs. Cre only	-2.087	-5.764 to 1.590	No	ns	0.4926
	Pycard–/–OvaFla+VillinER-Cre+ vs. Gsdmd–OvaFla+VillinER-Cre+	0.218	-2.803 to 3.239	No	ns	0.9999
	Pycard–/–OvaFla+VillinER-Cre+ vs. Nlrc4–OvaFla+VillinER-Cre+	1.429	-1.859 to 4.718	No	ns	0.7417
	Pycard–/–OvaFla+VillinER-Cre+ vs. OvaFla only	2.566	-0.2819 to 5.414	No	ns	0.0923
	Pycard–/–OvaFla+VillinER-Cre+ vs. Cre only	0.9462	-2.822 to 4.714	No	ns	0.9652
	Gsdmd–OvaFla+VillinER-Cre+ vs. Nlrc4–OvaFla+VillinER-Cre+	1.211	-2.228 to 4.651	No	ns	0.8701
	Gsdmd–OvaFla+VillinER-Cre+ vs. OvaFla only	2.348	-0.6727 to 5.369	No	ns	0.1869
	Gsdmd–OvaFla+VillinER-Cre+ vs. Cre only	0.7282	-3.172 to 4.628	No	ns	0.9905
	Nlrc4–OvaFla+VillinER-Cre+ vs. OvaFla only	1.137	-2.152 to 4.426	No	ns	0.8785
	Nlrc4–OvaFla+VillinER-Cre+ vs. Cre only	-0.4831	-4.594 to 3.628	No	ns	0.9989
	OvaFla only vs. Cre only	-1.62	-5.388 to 2.148	No	ns	0.7499

## Sheet: E
	Tukey's multiple comparisons test	Mean Diff.	95.00% CI of diff.	Below threshold?	Summary	Adjusted P Value
	OvaFla+VillinER-Cre+ vs. Pycard–/–OvaFla+VillinER-Cre+	14.22	4.891 to 23.55	Yes	***	0.0005
	OvaFla+VillinER-Cre+ vs. Gsdmd–OvaFla+VillinER-Cre+	17.29	6.848 to 27.72	Yes	***	0.0001
	OvaFla+VillinER-Cre+ vs. Nlrc4–OvaFla+VillinER-Cre+	17.03	7.231 to 26.83	Yes	****	<0.0001
	OvaFla+VillinER-Cre+ vs. OvaFla only	16.87	6.429 to 27.31	Yes	***	0.0002
	OvaFla+VillinER-Cre+ vs. Cre only	17.26	1.407 to 33.12	Yes	*	0.0253
	Pycard–/–OvaFla+VillinER-Cre+ vs. Gsdmd–OvaFla+VillinER-Cre+	3.066	-7.914 to 14.05	No	ns	0.9618
	Pycard–/–OvaFla+VillinER-Cre+ vs. Nlrc4–OvaFla+VillinER-Cre+	2.809	-7.564 to 13.18	No	ns	0.9665
	Pycard–/–OvaFla+VillinER-Cre+ vs. OvaFla only	2.647	-8.332 to 13.63	No	ns	0.9798
	Pycard–/–OvaFla+VillinER-Cre+ vs. Cre only	3.044	-13.17 to 19.26	No	ns	0.9935
	Gsdmd–OvaFla+VillinER-Cre+ vs. Nlrc4–OvaFla+VillinER-Cre+	-0.2568	-11.64 to 11.12	No	ns	>0.9999
	Gsdmd–OvaFla+VillinER-Cre+ vs. OvaFla only	-0.4187	-12.35 to 11.52	No	ns	>0.9999
	Gsdmd–OvaFla+VillinER-Cre+ vs. Cre only	-0.02233	-16.90 to 16.86	No	ns	>0.9999
	Nlrc4–OvaFla+VillinER-Cre+ vs. OvaFla only	-0.1619	-11.54 to 11.22	No	ns	>0.9999
	Nlrc4–OvaFla+VillinER-Cre+ vs. Cre only	0.2344	-16.26 to 16.73	No	ns	>0.9999
	OvaFla only vs. Cre only	0.3964	-16.48 to 17.28	No	ns	>0.9999
