# Supplementary material for: Inflammasome activation leads to cDC1-independent cross-priming of CD8 T cells by epithelial cell-derived antigen
Source: eLife. 2021 Dec 23;10:e72082. doi: 10.7554/eLife.72082 (PMC8719880; doi:10.7554/eLife.72082)
Supplement: Figure 2—source data 1. [file elife-72082-fig2-data1.xlsx]

## Sheet: B
	Tukey's multiple comparisons test	Mean Diff.	95.00% CI of diff.	Below threshold?	Summary	Adjusted P Value
	OvaFla+VillinER-Cre+ vs. Pycard–/–OvaFla+VillinER-Cre+	-0.5129	-6.998 to 5.972	No	ns	0.9999
	OvaFla+VillinER-Cre+ vs. Gsdmd–OvaFla+VillinER-Cre+	0.157	-6.328 to 6.642	No	ns	>0.9999
	OvaFla+VillinER-Cre+ vs. Nlrc4–OvaFla+VillinER-Cre+	-30.03	-36.81 to -23.26	Yes	****	<0.0001
	OvaFla+VillinER-Cre+ vs. OvaFla only	1.558	-5.216 to 8.331	No	ns	0.9787
	OvaFla+VillinER-Cre+ vs. Cre only	1.64	-6.181 to 9.462	No	ns	0.9858
	Pycard–/–OvaFla+VillinER-Cre+ vs. Gsdmd–OvaFla+VillinER-Cre+	0.6699	-5.514 to 6.853	No	ns	0.9994
	Pycard–/–OvaFla+VillinER-Cre+ vs. Nlrc4–OvaFla+VillinER-Cre+	-29.52	-36.00 to -23.03	Yes	****	<0.0001
	Pycard–/–OvaFla+VillinER-Cre+ vs. OvaFla only	2.071	-4.415 to 8.556	No	ns	0.9176
	Pycard–/–OvaFla+VillinER-Cre+ vs. Cre only	2.153	-5.420 to 9.726	No	ns	0.9479
	Gsdmd–OvaFla+VillinER-Cre+ vs. Nlrc4–OvaFla+VillinER-Cre+	-30.19	-36.67 to -23.70	Yes	****	<0.0001
	Gsdmd–OvaFla+VillinER-Cre+ vs. OvaFla only	1.401	-5.084 to 7.886	No	ns	0.9839
	Gsdmd–OvaFla+VillinER-Cre+ vs. Cre only	1.483	-6.090 to 9.057	No	ns	0.9896
	Nlrc4–OvaFla+VillinER-Cre+ vs. OvaFla only	31.59	24.82 to 38.36	Yes	****	<0.0001
	Nlrc4–OvaFla+VillinER-Cre+ vs. Cre only	31.67	23.85 to 39.49	Yes	****	<0.0001
	OvaFla only vs. Cre only	0.08258	-7.739 to 7.904	No	ns	>0.9999

## Sheet: C
	Tukey's multiple comparisons test	Mean Diff.	95.00% CI of diff.	Below threshold?	Summary	Adjusted P Value
	WT vs. Pycard–/–	-1.559	-5.260 to 2.143	No	ns	0.7174
	WT vs. Gsdmd–/–	-0.3574	-4.059 to 3.344	No	ns	0.9983
	WT vs. Nlrc4–/–	-9.194	-13.06 to -5.328	Yes	****	<0.0001
	WT vs. Cre only	0.7033	-3.761 to 5.168	No	ns	0.9891
	Pycard–/– vs. Gsdmd–/–	1.201	-2.328 to 4.731	No	ns	0.8438
	Pycard–/– vs. Nlrc4–/–	-7.635	-11.34 to -3.934	Yes	****	<0.0001
	Pycard–/– vs. Cre only	2.262	-2.060 to 6.585	No	ns	0.5344
	Gsdmd–/– vs. Nlrc4–/–	-8.837	-12.54 to -5.135	Yes	****	<0.0001
	Gsdmd–/– vs. Cre only	1.061	-3.262 to 5.383	No	ns	0.9458
	Nlrc4–/– vs. Cre only	9.898	5.433 to 14.36	Yes	****	<0.0001
