# Supplementary material for: Inflammasome activation leads to cDC1-independent cross-priming of CD8 T cells by epithelial cell-derived antigen
Source: eLife. 2021 Dec 23;10:e72082. doi: 10.7554/eLife.72082 (PMC8719880; doi:10.7554/eLife.72082)
Supplement: Figure 3—figure supplement 1—source data 1. [file elife-72082-fig3-figsupp1-data1.xlsx]

## Sheet: D
	SPLEEN
	Tukey's multiple comparisons test	Mean Diff.	95.00% CI of diff.	Below threshold?	Summary	Adjusted P Value
	OvaFla+VillinER-Cre+ vs. Pycard–OvaFla+VillinER-Cre+	-6.297	-21.81 to 9.215	No	ns	0.7879
	OvaFla+VillinER-Cre+ vs. Gsdmd–OvaFla+VillinER-Cre+	5.913	-8.428 to 20.25	No	ns	0.7782
	OvaFla+VillinER-Cre+ vs. Nlrc4–OvaFla+VillinER-Cre+	5.927	-7.991 to 19.84	No	ns	0.7571
	OvaFla+VillinER-Cre+ vs. OvaFla+	39.95	23.59 to 56.31	Yes	****	<0.0001
	Pycard–OvaFla+VillinER-Cre+ vs. Gsdmd–OvaFla+VillinER-Cre+	12.21	-3.985 to 28.41	No	ns	0.2279
	Pycard–OvaFla+VillinER-Cre+ vs. Nlrc4–OvaFla+VillinER-Cre+	12.22	-3.598 to 28.05	No	ns	0.2066
	Pycard–OvaFla+VillinER-Cre+ vs. OvaFla+	46.25	28.24 to 64.26	Yes	****	<0.0001
	Gsdmd–OvaFla+VillinER-Cre+ vs. Nlrc4–OvaFla+VillinER-Cre+	0.01393	-14.66 to 14.69	No	ns	>0.9999
	Gsdmd–OvaFla+VillinER-Cre+ vs. OvaFla+	34.04	17.03 to 51.05	Yes	****	<0.0001
	Nlrc4–OvaFla+VillinER-Cre+ vs. OvaFla+	34.03	17.37 to 50.68	Yes	****	<0.0001
	MESENTERIC LYMPH NODE
	Tukey's multiple comparisons test	Mean Diff.	95.00% CI of diff.	Below threshold?	Summary	Adjusted P Value
	OvaFla+VillinER-Cre+ vs. Pycard–OvaFla+VillinER-Cre+	-1.27	-13.33 to 10.79	No	ns	0.9983
	OvaFla+VillinER-Cre+ vs. Gsdmd–OvaFla+VillinER-Cre+	13.69	1.629 to 25.75	Yes	*	0.0181
	OvaFla+VillinER-Cre+ vs. Nlrc4–OvaFla+VillinER-Cre+	2.804	-8.018 to 13.63	No	ns	0.9502
	OvaFla+VillinER-Cre+ vs. OvaFla+	36.85	24.78 to 48.91	Yes	****	<0.0001
	Pycard–OvaFla+VillinER-Cre+ vs. Gsdmd–OvaFla+VillinER-Cre+	14.96	1.555 to 28.37	Yes	*	0.021
	Pycard–OvaFla+VillinER-Cre+ vs. Nlrc4–OvaFla+VillinER-Cre+	4.074	-8.228 to 16.38	No	ns	0.886
	Pycard–OvaFla+VillinER-Cre+ vs. OvaFla+	38.12	24.71 to 51.52	Yes	****	<0.0001
	Gsdmd–OvaFla+VillinER-Cre+ vs. Nlrc4–OvaFla+VillinER-Cre+	-10.89	-23.19 to 1.415	No	ns	0.1076
	Gsdmd–OvaFla+VillinER-Cre+ vs. OvaFla+	23.15	9.747 to 36.56	Yes	****	<0.0001
	Nlrc4–OvaFla+VillinER-Cre+ vs. OvaFla+	34.04	21.74 to 46.34	Yes	****	<0.0001

## Sheet: E
	MESENTERIC LYMPH NODE
	Tukey's multiple comparisons test	Mean Diff.	95.00% CI of diff.	Below threshold?	Summary	Adjusted P Value
	OvaFla+VillinER-Cre+ vs. Pycard–OvaFla+VillinER-Cre+	-2.35	-13.22 to 8.524	No	ns	0.9737
	OvaFla+VillinER-Cre+ vs. Gsdmd–OvaFla+VillinER-Cre+	2.166	-7.230 to 11.56	No	ns	0.9668
	OvaFla+VillinER-Cre+ vs. Nlrc4–OvaFla+VillinER-Cre+	-18.92	-28.46 to -9.381	Yes	****	<0.0001
	OvaFla+VillinER-Cre+ vs. OvaFla+	5.324	-4.749 to 15.40	No	ns	0.5778
	Pycard–OvaFla+VillinER-Cre+ vs. Gsdmd–OvaFla+VillinER-Cre+	4.516	-6.235 to 15.27	No	ns	0.764
	Pycard–OvaFla+VillinER-Cre+ vs. Nlrc4–OvaFla+VillinER-Cre+	-16.57	-27.44 to -5.694	Yes	***	0.0006
	Pycard–OvaFla+VillinER-Cre+ vs. OvaFla+	7.674	-3.673 to 19.02	No	ns	0.3295
	Gsdmd–OvaFla+VillinER-Cre+ vs. Nlrc4–OvaFla+VillinER-Cre+	-21.08	-30.48 to -11.69	Yes	****	<0.0001
	Gsdmd–OvaFla+VillinER-Cre+ vs. OvaFla+	3.158	-6.781 to 13.10	No	ns	0.8994
	Nlrc4–OvaFla+VillinER-Cre+ vs. OvaFla+	24.24	14.17 to 34.32	Yes	****	<0.0001
