# Supplementary material for: Inflammasome activation leads to cDC1-independent cross-priming of CD8 T cells by epithelial cell-derived antigen
Source: eLife. 2021 Dec 23;10:e72082. doi: 10.7554/eLife.72082 (PMC8719880; doi:10.7554/eLife.72082)
Supplement: Figure 3—source data 1. [file elife-72082-fig3-data1.xlsx]

## Sheet: B
	SPLEEN
	Tukey's multiple comparisons test	Mean Diff.	95.00% CI of diff.	Below threshold?	Summary	Adjusted P Value
	OvaFla+VillinER-Cre+ vs. Pycard–/–OvaFla+VillinER-Cre+	-0.4094	-0.6212 to -0.1976	Yes	****	<0.0001
	OvaFla+VillinER-Cre+ vs. Gsdmd–OvaFla+VillinER-Cre+	0.1412	-0.05015 to 0.3326	No	ns	0.2718
	OvaFla+VillinER-Cre+ vs. Nlrc4–OvaFla+VillinER-Cre+	0.114	-0.07182 to 0.2998	No	ns	0.4789
	OvaFla+VillinER-Cre+ vs. OvaFla only	0.3097	0.1183 to 0.5010	Yes	***	0.0001
	OvaFla+VillinER-Cre+ vs. Cre only	0.3581	0.1154 to 0.6007	Yes	***	0.0006
	Pycard–/–OvaFla+VillinER-Cre+ vs. Gsdmd–OvaFla+VillinER-Cre+	0.5506	0.3319 to 0.7693	Yes	****	<0.0001
	Pycard–/–OvaFla+VillinER-Cre+ vs. Nlrc4–OvaFla+VillinER-Cre+	0.5234	0.3095 to 0.7373	Yes	****	<0.0001
	Pycard–/–OvaFla+VillinER-Cre+ vs. OvaFla only	0.719	0.5003 to 0.9377	Yes	****	<0.0001
	Pycard–/–OvaFla+VillinER-Cre+ vs. Cre only	0.7675	0.5027 to 1.032	Yes	****	<0.0001
	Gsdmd–OvaFla+VillinER-Cre+ vs. Nlrc4–OvaFla+VillinER-Cre+	-0.0272	-0.2209 to 0.1665	No	ns	0.9985
	Gsdmd–OvaFla+VillinER-Cre+ vs. OvaFla only	0.1685	-0.03051 to 0.3674	No	ns	0.1454
	Gsdmd–OvaFla+VillinER-Cre+ vs. Cre only	0.2169	-0.03184 to 0.4656	No	ns	0.1237
	Nlrc4–OvaFla+VillinER-Cre+ vs. OvaFla only	0.1957	0.001994 to 0.3893	Yes	*	0.0462
	Nlrc4–OvaFla+VillinER-Cre+ vs. Cre only	0.2441	-0.0004094 to 0.4886	No	ns	0.0506
	OvaFla only vs. Cre only	0.04842	-0.2003 to 0.2971	No	ns	0.9929
	MESENTERIC LYMPH NODE
	Tukey's multiple comparisons test	Mean Diff.	95.00% CI of diff.	Below threshold?	Summary	Adjusted P Value
	OvaFla+VillinER-Cre+ vs. Pycard–/–OvaFla+VillinER-Cre+	-0.1691	-0.4192 to 0.08110	No	ns	0.3678
	OvaFla+VillinER-Cre+ vs. Gsdmd–OvaFla+VillinER-Cre+	0.2384	0.004353 to 0.4723	Yes	*	0.0433
	OvaFla+VillinER-Cre+ vs. Nlrc4–OvaFla+VillinER-Cre+	0.04245	-0.1692 to 0.2541	No	ns	0.9918
	OvaFla+VillinER-Cre+ vs. OvaFla only	0.3409	0.1022 to 0.5796	Yes	**	0.001
	OvaFla+VillinER-Cre+ vs. Cre only	0.3746	0.08803 to 0.6612	Yes	**	0.0034
	Pycard–/–OvaFla+VillinER-Cre+ vs. Gsdmd–OvaFla+VillinER-Cre+	0.4074	0.1421 to 0.6727	Yes	***	0.0003
	Pycard–/–OvaFla+VillinER-Cre+ vs. Nlrc4–OvaFla+VillinER-Cre+	0.2115	-0.03435 to 0.4574	No	ns	0.1333
	Pycard–/–OvaFla+VillinER-Cre+ vs. OvaFla only	0.5099	0.2404 to 0.7794	Yes	****	<0.0001
	Pycard–/–OvaFla+VillinER-Cre+ vs. Cre only	0.5437	0.2310 to 0.8564	Yes	****	<0.0001
	Gsdmd–OvaFla+VillinER-Cre+ vs. Nlrc4–OvaFla+VillinER-Cre+	-0.1959	-0.4253 to 0.03349	No	ns	0.1387
	Gsdmd–OvaFla+VillinER-Cre+ vs. OvaFla only	0.1025	-0.1521 to 0.3571	No	ns	0.8478
	Gsdmd–OvaFla+VillinER-Cre+ vs. Cre only	0.1363	-0.1637 to 0.4362	No	ns	0.7706
	Nlrc4–OvaFla+VillinER-Cre+ vs. OvaFla only	0.2984	0.06421 to 0.5326	Yes	**	0.0047
	Nlrc4–OvaFla+VillinER-Cre+ vs. Cre only	0.3322	0.04933 to 0.6150	Yes	*	0.0118
	OvaFla only vs. Cre only	0.03374	-0.2699 to 0.3374	No	ns	0.9995

## Sheet: C
	SPLEEN
	Tukey's multiple comparisons test	Mean Diff.	95.00% CI of diff.	Below threshold?	Summary	Adjusted P Value
	OvaFla+VillinER-Cre+ vs. Pycard–/–OvaFla+VillinER-Cre+	-25855	-42252 to -9458	Yes	***	0.0002
	OvaFla+VillinER-Cre+ vs. Gsdmd–OvaFla+VillinER-Cre+	13042	-1741 to 27825	No	ns	0.1155
	OvaFla+VillinER-Cre+ vs. Nlrc4–OvaFla+VillinER-Cre+	11137	-3210 to 25483	No	ns	0.2207
	OvaFla+VillinER-Cre+ vs. OvaFla only	21626	5992 to 37260	Yes	**	0.0016
	OvaFla+VillinER-Cre+ vs. Cre only	24192	5366 to 43017	Yes	**	0.0043
	Pycard–/–OvaFla+VillinER-Cre+ vs. Gsdmd–OvaFla+VillinER-Cre+	38897	21813 to 55981	Yes	****	<0.0001
	Pycard–/–OvaFla+VillinER-Cre+ vs. Nlrc4–OvaFla+VillinER-Cre+	36992	20284 to 53699	Yes	****	<0.0001
	Pycard–/–OvaFla+VillinER-Cre+ vs. OvaFla only	47481	29656 to 65306	Yes	****	<0.0001
	Pycard–/–OvaFla+VillinER-Cre+ vs. Cre only	50047	29365 to 70728	Yes	****	<0.0001
	Gsdmd–OvaFla+VillinER-Cre+ vs. Nlrc4–OvaFla+VillinER-Cre+	-1905	-17032 to 13222	No	ns	0.9991
	Gsdmd–OvaFla+VillinER-Cre+ vs. OvaFla only	8584	-7769 to 24937	No	ns	0.6457
	Gsdmd–OvaFla+VillinER-Cre+ vs. Cre only	11150	-8277 to 30577	No	ns	0.5529
	Nlrc4–OvaFla+VillinER-Cre+ vs. OvaFla only	10489	-5470 to 26449	No	ns	0.3995
	Nlrc4–OvaFla+VillinER-Cre+ vs. Cre only	13055	-6042 to 32152	No	ns	0.3548
	OvaFla only vs. Cre only	2566	-17516 to 22648	No	ns	0.999
	MESENTERIC LYMPH NODE
	Tukey's multiple comparisons test	Mean Diff.	95.00% CI of diff.	Below threshold?	Summary	Adjusted P Value
	OvaFla+VillinER-Cre+ vs. Pycard–/–OvaFla+VillinER-Cre+	-4116	-9043 to 810.1	No	ns	0.1554
	OvaFla+VillinER-Cre+ vs. Gsdmd–OvaFla+VillinER-Cre+	5073	464.9 to 9682	Yes	*	0.0224
	OvaFla+VillinER-Cre+ vs. Nlrc4–OvaFla+VillinER-Cre+	-1804	-6126 to 2519	No	ns	0.827
	OvaFla+VillinER-Cre+ vs. OvaFla only	7465	2764 to 12167	Yes	***	0.0002
	OvaFla+VillinER-Cre+ vs. Cre only	8152	2508 to 13796	Yes	***	0.0009
	Pycard–/–OvaFla+VillinER-Cre+ vs. Gsdmd–OvaFla+VillinER-Cre+	9190	3964 to 14415	Yes	****	<0.0001
	Pycard–/–OvaFla+VillinER-Cre+ vs. Nlrc4–OvaFla+VillinER-Cre+	2313	-2662 to 7288	No	ns	0.7524
	Pycard–/–OvaFla+VillinER-Cre+ vs. OvaFla only	11582	6274 to 16889	Yes	****	<0.0001
	Pycard–/–OvaFla+VillinER-Cre+ vs. Cre only	12269	6111 to 18427	Yes	****	<0.0001
	Gsdmd–OvaFla+VillinER-Cre+ vs. Nlrc4–OvaFla+VillinER-Cre+	-6877	-11537 to -2217	Yes	***	0.0006
	Gsdmd–OvaFla+VillinER-Cre+ vs. OvaFla only	2392	-2621 to 7406	No	ns	0.7315
	Gsdmd–OvaFla+VillinER-Cre+ vs. Cre only	3079	-2828 to 8986	No	ns	0.6518
	Nlrc4–OvaFla+VillinER-Cre+ vs. OvaFla only	9269	4517 to 14021	Yes	****	<0.0001
	Nlrc4–OvaFla+VillinER-Cre+ vs. Cre only	9956	4270 to 15642	Yes	****	<0.0001
	OvaFla only vs. Cre only	686.8	-5293 to 6666	No	ns	0.9994

## Sheet: D
	SPLEEN
	Tukey's multiple comparisons test	Mean Diff.	95.00% CI of diff.	Below threshold?	Summary	Adjusted P Value
	OvaFla+VillinER-Cre+ vs. Pycard–OvaFla+VillinER-Cre+	-20163	-34313 to -6013	Yes	**	0.0014
	OvaFla+VillinER-Cre+ vs. Gsdmd–OvaFla+VillinER-Cre+	11192	-1592 to 23975	No	ns	0.1143
	OvaFla+VillinER-Cre+ vs. Nlrc4–OvaFla+VillinER-Cre+	10288	-2126 to 22703	No	ns	0.1513
	OvaFla+VillinER-Cre+ vs. OvaFla+	17457	3953 to 30960	Yes	**	0.0048
	Pycard–OvaFla+VillinER-Cre+ vs. Gsdmd–OvaFla+VillinER-Cre+	31354	16744 to 45965	Yes	****	<0.0001
	Pycard–OvaFla+VillinER-Cre+ vs. Nlrc4–OvaFla+VillinER-Cre+	30451	16162 to 44740	Yes	****	<0.0001
	Pycard–OvaFla+VillinER-Cre+ vs. OvaFla+	37620	22375 to 52864	Yes	****	<0.0001
	Gsdmd–OvaFla+VillinER-Cre+ vs. Nlrc4–OvaFla+VillinER-Cre+	-903.3	-13841 to 12034	No	ns	0.9997
	Gsdmd–OvaFla+VillinER-Cre+ vs. OvaFla+	6265	-7721 to 20251	No	ns	0.7214
	Nlrc4–OvaFla+VillinER-Cre+ vs. OvaFla+	7168	-6481 to 20818	No	ns	0.5867
	MESENTERIC LYMPH NODE
	Tukey's multiple comparisons test	Mean Diff.	95.00% CI of diff.	Below threshold?	Summary	Adjusted P Value
	OvaFla+VillinER-Cre+ vs. Pycard–OvaFla+VillinER-Cre+	-3278	-7110 to 553.8	No	ns	0.129
	OvaFla+VillinER-Cre+ vs. Gsdmd–OvaFla+VillinER-Cre+	4884	1300 to 8469	Yes	**	0.0026
	OvaFla+VillinER-Cre+ vs. Nlrc4–OvaFla+VillinER-Cre+	-726.2	-4088 to 2636	No	ns	0.974
	OvaFla+VillinER-Cre+ vs. OvaFla+	6760	3021 to 10499	Yes	****	<0.0001
	Pycard–OvaFla+VillinER-Cre+ vs. Gsdmd–OvaFla+VillinER-Cre+	8163	4098 to 12227	Yes	****	<0.0001
	Pycard–OvaFla+VillinER-Cre+ vs. Nlrc4–OvaFla+VillinER-Cre+	2552	-1318 to 6422	No	ns	0.3566
	Pycard–OvaFla+VillinER-Cre+ vs. OvaFla+	10038	5837 to 14240	Yes	****	<0.0001
	Gsdmd–OvaFla+VillinER-Cre+ vs. Nlrc4–OvaFla+VillinER-Cre+	-5610	-9235 to -1986	Yes	***	0.0004
	Gsdmd–OvaFla+VillinER-Cre+ vs. OvaFla+	1876	-2101 to 5853	No	ns	0.6804
	Nlrc4–OvaFla+VillinER-Cre+ vs. OvaFla+	7486	3709 to 11264	Yes	****	<0.0001
