# Supplementary material for: Inflammasome activation leads to cDC1-independent cross-priming of CD8 T cells by epithelial cell-derived antigen
Source: eLife. 2021 Dec 23;10:e72082. doi: 10.7554/eLife.72082 (PMC8719880; doi:10.7554/eLife.72082)
Supplement: Figure 4—figure supplement 1—source data 1. [file elife-72082-fig4-figsupp1-data1.xlsx]

## Sheet: A
	Tukey's multiple comparisons test	Mean Diff.	95.00% CI of diff.	Below threshold?	Summary	Adjusted P Value
	Bm1+OvaFla+VillinERCre+ vs. Bm1+gsdmd–OvaFla+VillinER-Cre+	20.3	13.03 to 27.56	Yes	****	<0.0001
	Bm1+OvaFla+VillinERCre+ vs. Bm1+Nlrc4–OvaFla–VillinERCre+	20.2	12.68 to 27.71	Yes	****	<0.0001
	Bm1+OvaFla+VillinERCre+ vs. OvaFla only	20.12	11.22 to 29.01	Yes	****	<0.0001
	Bm1+OvaFla+VillinERCre+ vs. Bm1+Cre+	20.29	12.01 to 28.58	Yes	****	<0.0001
	Bm1+gsdmd–OvaFla+VillinER-Cre+ vs. Bm1+Nlrc4–OvaFla–VillinERCre+	-0.09992	-7.618 to 7.418	No	ns	>0.9999
	Bm1+gsdmd–OvaFla+VillinER-Cre+ vs. OvaFla only	-0.1789	-9.075 to 8.717	No	ns	>0.9999
	Bm1+gsdmd–OvaFla+VillinER-Cre+ vs. Bm1+Cre+	-0.002106	-8.284 to 8.279	No	ns	>0.9999
	Bm1+Nlrc4–OvaFla–VillinERCre+ vs. OvaFla only	-0.07896	-9.184 to 9.026	No	ns	>0.9999
	Bm1+Nlrc4–OvaFla–VillinERCre+ vs. Bm1+Cre+	0.09781	-8.408 to 8.604	No	ns	>0.9999
	OvaFla only vs. Bm1+Cre+	0.1768	-9.568 to 9.922	No	ns	>0.9999

## Sheet: C
	SPLEEN
	Tukey's multiple comparisons test	Mean Diff.	95.00% CI of diff.	Below threshold?	Summary	Adjusted P Value
	Bm1+OvaFla+VillinERCre+ vs. Bm1+gsdmd–OvaFla+VillinER-Cre+	14.73	-6.442 to 35.90	No	ns	0.2956
	Bm1+OvaFla+VillinERCre+ vs. Bm1+Nlrc4–OvaFla+VillinERCre+	21.42	0.2510 to 42.59	Yes	*	0.0461
	Bm1+OvaFla+VillinERCre+ vs. Bm1+OvaFla only	35.84	11.02 to 60.67	Yes	**	0.0015
	Bm1+OvaFla+VillinERCre+ vs. Cre only	62.3	30.55 to 94.06	Yes	****	<0.0001
	Bm1+gsdmd–OvaFla+VillinER-Cre+ vs. Bm1+Nlrc4–OvaFla+VillinERCre+	6.693	-14.48 to 27.86	No	ns	0.8973
	Bm1+gsdmd–OvaFla+VillinER-Cre+ vs. Bm1+OvaFla only	21.11	-3.711 to 45.94	No	ns	0.1302
	Bm1+gsdmd–OvaFla+VillinER-Cre+ vs. Cre only	47.58	15.82 to 79.33	Yes	***	0.0009
	Bm1+Nlrc4–OvaFla+VillinERCre+ vs. Bm1+OvaFla only	14.42	-10.40 to 39.25	No	ns	0.4767
	Bm1+Nlrc4–OvaFla+VillinERCre+ vs. Cre only	40.88	9.128 to 72.64	Yes	**	0.0056
	Bm1+OvaFla only vs. Cre only	26.46	-7.838 to 60.76	No	ns	0.2026
	MESENTERIC LYMPH NODE
	Tukey's multiple comparisons test	Mean Diff.	95.00% CI of diff.	Below threshold?	Summary	Adjusted P Value
	Bm1+OvaFla+VillinERCre+ vs. Bm1+gsdmd–OvaFla+VillinER-Cre+	21.43	3.051 to 39.82	Yes	*	0.0149
	Bm1+OvaFla+VillinERCre+ vs. Bm1+Nlrc4–OvaFla+VillinERCre+	13.59	-4.454 to 31.63	No	ns	0.2223
	Bm1+OvaFla+VillinERCre+ vs. Bm1+OvaFla only	65.65	44.50 to 86.81	Yes	****	<0.0001
	Bm1+OvaFla+VillinERCre+ vs. Cre only	66.01	35.64 to 96.37	Yes	****	<0.0001
	Bm1+gsdmd–OvaFla+VillinER-Cre+ vs. Bm1+Nlrc4–OvaFla+VillinERCre+	-7.849	-26.23 to 10.53	No	ns	0.745
	Bm1+gsdmd–OvaFla+VillinER-Cre+ vs. Bm1+OvaFla only	44.22	22.77 to 65.67	Yes	****	<0.0001
	Bm1+gsdmd–OvaFla+VillinER-Cre+ vs. Cre only	44.57	14.00 to 75.14	Yes	**	0.0013
	Bm1+Nlrc4–OvaFla+VillinERCre+ vs. Bm1+OvaFla only	52.07	30.91 to 73.22	Yes	****	<0.0001
	Bm1+Nlrc4–OvaFla+VillinERCre+ vs. Cre only	52.42	22.06 to 82.79	Yes	***	0.0001
	Bm1+OvaFla only vs. Cre only	0.3542	-31.96 to 32.67	No	ns	>0.9999

## Sheet: D
	Tukey's multiple comparisons test	Mean Diff.	95.00% CI of diff.	Below threshold?	Summary	Adjusted P Value
	Bm1+OvaFla+VillinERCre+ vs. Bm1+gsdmd–OvaFla+VillinER-Cre+	-0.035	-9.389 to 9.319	No	ns	>0.9999
	Bm1+OvaFla+VillinERCre+ vs. Bm1+Nlrc4–OvaFla+VillinERCre+	-0.075	-9.935 to 9.785	No	ns	0.9998
	Bm1+gsdmd–OvaFla+VillinER-Cre+ vs. Bm1+Nlrc4–OvaFla+VillinERCre+	-0.04	-9.394 to 9.314	No	ns	>0.9999
