# Supplementary material for: Inflammasome activation leads to cDC1-independent cross-priming of CD8 T cells by epithelial cell-derived antigen
Source: eLife. 2021 Dec 23;10:e72082. doi: 10.7554/eLife.72082 (PMC8719880; doi:10.7554/eLife.72082)
Supplement: Figure 4—source data 1. [file elife-72082-fig4-data1.xlsx]

## Sheet: B
	LEFT
	Tukey's multiple comparisons test	Mean Diff.	95.00% CI of diff.	Below threshold?	Summary	Adjusted P Value
	Bm1+OvaFla+VillinERCre+ vs. Bm1+gsdmd–OvaFla+VillinER-Cre+	0.2248	0.05181 to 0.3978	Yes	**	0.0049
	Bm1+OvaFla+VillinERCre+ vs. Bm1+Nlrc4–OvaFla+VillinERCre+	0.1206	-0.05233 to 0.2936	No	ns	0.2952
	Bm1+OvaFla+VillinERCre+ vs. OvaFla only	0.202	0.006504 to 0.3976	Yes	*	0.0396
	Bm1+OvaFla+VillinERCre+ vs. Cre only	0.2778	0.07501 to 0.4807	Yes	**	0.0027
	Bm1+gsdmd–OvaFla+VillinER-Cre+ vs. Bm1+Nlrc4–OvaFla+VillinERCre+	-0.1041	-0.2771 to 0.06883	No	ns	0.4431
	Bm1+gsdmd–OvaFla+VillinER-Cre+ vs. OvaFla only	-0.02275	-0.2183 to 0.1728	No	ns	0.9974
	Bm1+gsdmd–OvaFla+VillinER-Cre+ vs. Cre only	0.05306	-0.1498 to 0.2559	No	ns	0.9465
	Bm1+Nlrc4–OvaFla+VillinERCre+ vs. OvaFla only	0.08139	-0.1141 to 0.2769	No	ns	0.7656
	Bm1+Nlrc4–OvaFla+VillinERCre+ vs. Cre only	0.1572	-0.04563 to 0.3600	No	ns	0.2002
	OvaFla only vs. Cre only	0.07581	-0.1466 to 0.2982	No	ns	0.8708
	MIDDLE
	Tukey's multiple comparisons test	Mean Diff.	95.00% CI of diff.	Below threshold?	Summary	Adjusted P Value
	Bm1+OvaFla+VillinERCre+ vs. Bm1+gsdmd–OvaFla+VillinER-Cre+	11636	2711 to 20561	Yes	**	0.0047
	Bm1+OvaFla+VillinERCre+ vs. Bm1+Nlrc4–OvaFla+VillinERCre+	8829	-96.11 to 17753	No	ns	0.0539
	Bm1+OvaFla+VillinERCre+ vs. Bm1 OvaFla only	10649	560.7 to 20737	Yes	*	0.0337
	Bm1+OvaFla+VillinERCre+ vs. Cre only	15251	4786 to 25716	Yes	**	0.0012
	Bm1+gsdmd–OvaFla+VillinER-Cre+ vs. Bm1+Nlrc4–OvaFla+VillinERCre+	-2807	-11732 to 6117	No	ns	0.9002
	Bm1+gsdmd–OvaFla+VillinER-Cre+ vs. Bm1 OvaFla only	-987	-11075 to 9101	No	ns	0.9987
	Bm1+gsdmd–OvaFla+VillinER-Cre+ vs. Cre only	3615	-6850 to 14080	No	ns	0.8654
	Bm1+Nlrc4–OvaFla+VillinERCre+ vs. Bm1 OvaFla only	1820	-8268 to 11909	No	ns	0.9861
	Bm1+Nlrc4–OvaFla+VillinERCre+ vs. Cre only	6422	-4043 to 16887	No	ns	0.4236
	Bm1 OvaFla only vs. Cre only	4602	-6872 to 16075	No	ns	0.789
	RIGHT
	Tukey's multiple comparisons test	Mean Diff.	95.00% CI of diff.	Below threshold?	Summary	Adjusted P Value
	Bm1+OvaFla+VillinERCre+ vs. Bm1+gsdmd–OvaFla+VillinER-Cre+	9743	4191 to 15295	Yes	****	<0.0001
	Bm1+OvaFla+VillinERCre+ vs. Bm1+Nlrc4–OvaFla+VillinERCre+	8023	2471 to 13575	Yes	**	0.0014
	Bm1+OvaFla+VillinERCre+ vs. Bm1+ OvaFla only	10501	4225 to 16777	Yes	***	0.0002
	Bm1+OvaFla+VillinERCre+ vs. Cre only	12878	4550 to 21206	Yes	***	0.0006
	Bm1+gsdmd–OvaFla+VillinER-Cre+ vs. Bm1+Nlrc4–OvaFla+VillinERCre+	-1720	-7272 to 3832	No	ns	0.9042
	Bm1+gsdmd–OvaFla+VillinER-Cre+ vs. Bm1+ OvaFla only	757.5	-5518 to 7033	No	ns	0.997
	Bm1+gsdmd–OvaFla+VillinER-Cre+ vs. Cre only	3135	-5193 to 11463	No	ns	0.8233
	Bm1+Nlrc4–OvaFla+VillinERCre+ vs. Bm1+ OvaFla only	2477	-3799 to 8753	No	ns	0.7968
	Bm1+Nlrc4–OvaFla+VillinERCre+ vs. Cre only	4855	-3473 to 13183	No	ns	0.4738
	Bm1+ OvaFla only vs. Cre only	2378	-6450 to 11205	No	ns	0.9402

## Sheet: C
	LEFT
	Tukey's multiple comparisons test	Mean Diff.	95.00% CI of diff.	Below threshold?	Summary	Adjusted P Value
	Bm1+OvaFla+VillinERCre+ vs. Bm1+gsdmd–OvaFla+VillinER-Cre+	0.2663	-0.2065 to 0.7390	No	ns	0.5095
	Bm1+OvaFla+VillinERCre+ vs. Bm1+Nlrc4–OvaFla+VillinERCre+	-0.23	-0.6939 to 0.2339	No	ns	0.6299
	Bm1+OvaFla+VillinERCre+ vs. OvaFla only	0.3879	-0.1365 to 0.9123	No	ns	0.2398
	Bm1+OvaFla+VillinERCre+ vs. Cre only	0.5244	-0.04379 to 1.093	No	ns	0.0836
	Bm1+gsdmd–OvaFla+VillinER-Cre+ vs. Bm1+Nlrc4–OvaFla+VillinERCre+	-0.4963	-0.9690 to -0.02348	Yes	*	0.0352
	Bm1+gsdmd–OvaFla+VillinER-Cre+ vs. OvaFla only	0.1216	-0.4106 to 0.6539	No	ns	0.9667
	Bm1+gsdmd–OvaFla+VillinER-Cre+ vs. Cre only	0.2582	-0.3173 to 0.8336	No	ns	0.7118
	Bm1+Nlrc4–OvaFla+VillinERCre+ vs. OvaFla only	0.6179	0.09347 to 1.142	Yes	*	0.0133
	Bm1+Nlrc4–OvaFla+VillinERCre+ vs. Cre only	0.7544	0.1862 to 1.323	Yes	**	0.0039
	OvaFla only vs. Cre only	0.1365	-0.4821 to 0.7551	No	ns	0.9706
	MIDDLE
	Tukey's multiple comparisons test	Mean Diff.	95.00% CI of diff.	Below threshold?	Summary	Adjusted P Value
	Bm1+OvaFla+VillinERCre+ vs. Bm1+gsdmd–OvaFla+VillinER-Cre+	4229	-4703 to 13162	No	ns	0.6692
	Bm1+OvaFla+VillinERCre+ vs. Bm1+Nlrc4–OvaFla+VillinERCre+	-5077	-13843 to 3688	No	ns	0.4813
	Bm1+OvaFla+VillinERCre+ vs. Bm1 OvaFla only	5609	-4299 to 15518	No	ns	0.5043
	Bm1+OvaFla+VillinERCre+ vs. Cre only	7463	-3273 to 18198	No	ns	0.2976
	Bm1+gsdmd–OvaFla+VillinER-Cre+ vs. Bm1+Nlrc4–OvaFla+VillinERCre+	-9306	-18239 to -374.0	Yes	*	0.0372
	Bm1+gsdmd–OvaFla+VillinER-Cre+ vs. Bm1 OvaFla only	1380	-8676 to 11436	No	ns	0.9951
	Bm1+gsdmd–OvaFla+VillinER-Cre+ vs. Cre only	3234	-7638 to 14106	No	ns	0.9167
	Bm1+Nlrc4–OvaFla+VillinERCre+ vs. Bm1 OvaFla only	10687	778.2 to 20595	Yes	*	0.0285
	Bm1+Nlrc4–OvaFla+VillinERCre+ vs. Cre only	12540	1805 to 23276	Yes	*	0.0144
	Bm1 OvaFla only vs. Cre only	1854	-9834 to 13541	No	ns	0.9914
	RIGHT
	Tukey's multiple comparisons test	Mean Diff.	95.00% CI of diff.	Below threshold?	Summary	Adjusted P Value
	Bm1+OvaFla+VillinERCre+ vs. Bm1+gsdmd–OvaFla+VillinER-Cre+	4089	-1585 to 9763	No	ns	0.2621
	Bm1+OvaFla+VillinERCre+ vs. Bm1+Nlrc4–OvaFla+VillinERCre+	-2104	-7673 to 3464	No	ns	0.8204
	Bm1+OvaFla+VillinERCre+ vs. Bm1+ OvaFla only	5899	-395.6 to 12193	No	ns	0.0761
	Bm1+OvaFla+VillinERCre+ vs. Cre only	5906	-3466 to 15279	No	ns	0.3934
	Bm1+gsdmd–OvaFla+VillinER-Cre+ vs. Bm1+Nlrc4–OvaFla+VillinERCre+	-6193	-11868 to -518.8	Yes	*	0.0261
	Bm1+gsdmd–OvaFla+VillinER-Cre+ vs. Bm1+ OvaFla only	1810	-4579 to 8198	No	ns	0.9285
	Bm1+gsdmd–OvaFla+VillinER-Cre+ vs. Cre only	1817	-7619 to 11254	No	ns	0.9819
	Bm1+Nlrc4–OvaFla+VillinERCre+ vs. Bm1+ OvaFla only	8003	1709 to 14297	Yes	**	0.0064
	Bm1+Nlrc4–OvaFla+VillinERCre+ vs. Cre only	8011	-1362 to 17384	No	ns	0.1269
	Bm1+ OvaFla only vs. Cre only	7.677	-9814 to 9829	No	ns	>0.9999
