# Supplementary material for: Inflammasome activation leads to cDC1-independent cross-priming of CD8 T cells by epithelial cell-derived antigen
Source: eLife. 2021 Dec 23;10:e72082. doi: 10.7554/eLife.72082 (PMC8719880; doi:10.7554/eLife.72082)
Supplement: Figure 5—figure supplement 1—source data 1. [file elife-72082-fig5-figsupp1-data1.xlsx]

## Sheet: B
	LEFT
	Tukey's multiple comparisons test	Predicted (LS) mean diff.	95.00% CI of diff.	Below threshold?	Summary	Adjusted P Value
	mLN
	OvaFla+VillinER-Cre+ vs. Pycard–OvaFla+VillinER-Cre+	-0.2214	-5.447 to 5.004	No	ns	>0.9999
	OvaFla+VillinER-Cre+ vs. Gsdmd–OvaFla+VillinER-Cre+	1.577	-3.648 to 6.803	No	ns	0.9144
	OvaFla+VillinER-Cre+ vs. Nlrc4–OvaFla+VillinER-Cre+	1.773	-3.276 to 6.821	No	ns	0.8604
	OvaFla+VillinER-Cre+ vs. Cre only	1.292	-4.161 to 6.744	No	ns	0.963
	Pycard–OvaFla+VillinER-Cre+ vs. Gsdmd–OvaFla+VillinER-Cre+	1.799	-3.598 to 7.195	No	ns	0.8816
	Pycard–OvaFla+VillinER-Cre+ vs. Nlrc4–OvaFla+VillinER-Cre+	1.994	-3.232 to 7.219	No	ns	0.82
	Pycard–OvaFla+VillinER-Cre+ vs. Cre only	1.513	-4.104 to 7.130	No	ns	0.9418
	Gsdmd–OvaFla+VillinER-Cre+ vs. Nlrc4–OvaFla+VillinER-Cre+	0.1954	-5.030 to 5.421	No	ns	>0.9999
	Gsdmd–OvaFla+VillinER-Cre+ vs. Cre only	-0.2855	-5.903 to 5.332	No	ns	>0.9999
	Nlrc4–OvaFla+VillinER-Cre+ vs. Cre only	-0.4808	-5.934 to 4.972	No	ns	0.9991
	Spleen
	OvaFla+VillinER-Cre+ vs. Pycard–OvaFla+VillinER-Cre+	8.121	2.896 to 13.35	Yes	***	0.0005
	OvaFla+VillinER-Cre+ vs. Gsdmd–OvaFla+VillinER-Cre+	2.814	-2.411 to 8.040	No	ns	0.558
	OvaFla+VillinER-Cre+ vs. Nlrc4–OvaFla+VillinER-Cre+	1.814	-3.235 to 6.862	No	ns	0.8501
	OvaFla+VillinER-Cre+ vs. Cre only	-0.45	-5.903 to 5.003	No	ns	0.9993
	Pycard–OvaFla+VillinER-Cre+ vs. Gsdmd–OvaFla+VillinER-Cre+	-5.307	-10.70 to 0.08971	No	ns	0.0561
	Pycard–OvaFla+VillinER-Cre+ vs. Nlrc4–OvaFla+VillinER-Cre+	-6.308	-11.53 to -1.082	Yes	*	0.0103
	Pycard–OvaFla+VillinER-Cre+ vs. Cre only	-8.571	-14.19 to -2.954	Yes	***	0.0006
	Gsdmd–OvaFla+VillinER-Cre+ vs. Nlrc4–OvaFla+VillinER-Cre+	-1.001	-6.226 to 4.225	No	ns	0.983
	Gsdmd–OvaFla+VillinER-Cre+ vs. Cre only	-3.264	-8.882 to 2.353	No	ns	0.4826
	Nlrc4–OvaFla+VillinER-Cre+ vs. Cre only	-2.264	-7.717 to 3.189	No	ns	0.7702
	RIGHT
	Tukey's multiple comparisons test	Predicted (LS) mean diff.	95.00% CI of diff.	Below threshold?	Summary	Adjusted P Value
	mLN
	OvaFla+VillinER-Cre+ vs. Pycard–OvaFla+VillinER-Cre+	-5.791	-21.23 to 9.643	No	ns	0.8289
	OvaFla+VillinER-Cre+ vs. Gsdmd–OvaFla+VillinER-Cre+	-9.277	-24.71 to 6.158	No	ns	0.4483
	OvaFla+VillinER-Cre+ vs. Nlrc4–OvaFla+VillinER-Cre+	-5.063	-19.97 to 9.849	No	ns	0.8744
	OvaFla+VillinER-Cre+ vs. Cre only	-4.446	-20.55 to 11.66	No	ns	0.9367
	Pycard–OvaFla+VillinER-Cre+ vs. Gsdmd–OvaFla+VillinER-Cre+	-3.486	-19.43 to 12.45	No	ns	0.9723
	Pycard–OvaFla+VillinER-Cre+ vs. Nlrc4–OvaFla+VillinER-Cre+	0.7286	-14.71 to 16.16	No	ns	>0.9999
	Pycard–OvaFla+VillinER-Cre+ vs. Cre only	1.345	-15.25 to 17.94	No	ns	0.9994
	Gsdmd–OvaFla+VillinER-Cre+ vs. Nlrc4–OvaFla+VillinER-Cre+	4.214	-11.22 to 19.65	No	ns	0.939
	Gsdmd–OvaFla+VillinER-Cre+ vs. Cre only	4.831	-11.76 to 21.42	No	ns	0.9241
	Nlrc4–OvaFla+VillinER-Cre+ vs. Cre only	0.6167	-15.49 to 16.72	No	ns	>0.9999
	Spleen
	OvaFla+VillinER-Cre+ vs. Pycard–OvaFla+VillinER-Cre+	3.936	-11.50 to 19.37	No	ns	0.9519
	OvaFla+VillinER-Cre+ vs. Gsdmd–OvaFla+VillinER-Cre+	-7.721	-23.16 to 7.713	No	ns	0.6265
	OvaFla+VillinER-Cre+ vs. Nlrc4–OvaFla+VillinER-Cre+	-5.573	-20.48 to 9.339	No	ns	0.8309
	OvaFla+VillinER-Cre+ vs. Cre only	-6.609	-22.71 to 9.497	No	ns	0.7776
	Pycard–OvaFla+VillinER-Cre+ vs. Gsdmd–OvaFla+VillinER-Cre+	-11.66	-27.60 to 4.283	No	ns	0.2529
	Pycard–OvaFla+VillinER-Cre+ vs. Nlrc4–OvaFla+VillinER-Cre+	-9.509	-24.94 to 5.926	No	ns	0.423
	Pycard–OvaFla+VillinER-Cre+ vs. Cre only	-10.55	-27.14 to 6.046	No	ns	0.391
	Gsdmd–OvaFla+VillinER-Cre+ vs. Nlrc4–OvaFla+VillinER-Cre+	2.149	-13.29 to 17.58	No	ns	0.9949
	Gsdmd–OvaFla+VillinER-Cre+ vs. Cre only	1.112	-15.48 to 17.70	No	ns	0.9997
	Nlrc4–OvaFla+VillinER-Cre+ vs. Cre only	-1.037	-17.14 to 15.07	No	ns	0.9998

## Sheet: C
	LEFT
	Tukey's multiple comparisons test	Predicted (LS) mean diff.	95.00% CI of diff.	Below threshold?	Summary	Adjusted P Value
	mLN
	OvaFla+VillinER-Cre+ vs. Pycard–OvaFla+VillinER-Cre+	-2.888	-20.57 to 14.80	No	ns	0.9907
	OvaFla+VillinER-Cre+ vs. Gsdmd–OvaFla+VillinER-Cre+	-0.6446	-18.33 to 17.04	No	ns	>0.9999
	OvaFla+VillinER-Cre+ vs. Nlrc4–OvaFla+VillinER-Cre+	-3.375	-20.46 to 13.71	No	ns	0.9809
	OvaFla+VillinER-Cre+ vs. Cre only	-5.054	-23.51 to 13.40	No	ns	0.9384
	Pycard–OvaFla+VillinER-Cre+ vs. Gsdmd–OvaFla+VillinER-Cre+	2.243	-16.02 to 20.51	No	ns	0.9969
	Pycard–OvaFla+VillinER-Cre+ vs. Nlrc4–OvaFla+VillinER-Cre+	-0.4875	-18.17 to 17.20	No	ns	>0.9999
	Pycard–OvaFla+VillinER-Cre+ vs. Cre only	-2.167	-21.18 to 16.84	No	ns	0.9977
	Gsdmd–OvaFla+VillinER-Cre+ vs. Nlrc4–OvaFla+VillinER-Cre+	-2.73	-20.41 to 14.95	No	ns	0.9924
	Gsdmd–OvaFla+VillinER-Cre+ vs. Cre only	-4.41	-23.42 to 14.60	No	ns	0.9657
	Nlrc4–OvaFla+VillinER-Cre+ vs. Cre only	-1.679	-20.13 to 16.77	No	ns	0.999
	Spleen
	OvaFla+VillinER-Cre+ vs. Pycard–OvaFla+VillinER-Cre+	-14.23	-31.91 to 3.455	No	ns	0.1717
	OvaFla+VillinER-Cre+ vs. Gsdmd–OvaFla+VillinER-Cre+	-5.529	-23.21 to 12.15	No	ns	0.9038
	OvaFla+VillinER-Cre+ vs. Nlrc4–OvaFla+VillinER-Cre+	1.163	-15.92 to 18.25	No	ns	0.9997
	OvaFla+VillinER-Cre+ vs. Cre only	0.5333	-17.92 to 18.99	No	ns	>0.9999
	Pycard–OvaFla+VillinER-Cre+ vs. Gsdmd–OvaFla+VillinER-Cre+	8.7	-9.563 to 26.96	No	ns	0.6686
	Pycard–OvaFla+VillinER-Cre+ vs. Nlrc4–OvaFla+VillinER-Cre+	15.39	-2.292 to 33.07	No	ns	0.117
	Pycard–OvaFla+VillinER-Cre+ vs. Cre only	14.76	-4.247 to 33.77	No	ns	0.2002
	Gsdmd–OvaFla+VillinER-Cre+ vs. Nlrc4–OvaFla+VillinER-Cre+	6.691	-10.99 to 24.37	No	ns	0.8245
	Gsdmd–OvaFla+VillinER-Cre+ vs. Cre only	6.062	-12.95 to 25.07	No	ns	0.8973
	Nlrc4–OvaFla+VillinER-Cre+ vs. Cre only	-0.6292	-19.08 to 17.82	No	ns	>0.9999
	RIGHT
	Tukey's multiple comparisons test	Predicted (LS) mean diff.	95.00% CI of diff.	Below threshold?	Summary	Adjusted P Value
	mLN
	OvaFla+VillinER-Cre+ vs. Pycard–OvaFla+VillinER-Cre+	0.7321	-16.12 to 17.58	No	ns	>0.9999
	OvaFla+VillinER-Cre+ vs. Gsdmd–OvaFla+VillinER-Cre+	-1.025	-17.87 to 15.82	No	ns	0.9998
	OvaFla+VillinER-Cre+ vs. Nlrc4–OvaFla+VillinER-Cre+	5.325	-10.95 to 21.60	No	ns	0.8884
	OvaFla+VillinER-Cre+ vs. Cre only	5.433	-12.15 to 23.01	No	ns	0.9074
	Pycard–OvaFla+VillinER-Cre+ vs. Gsdmd–OvaFla+VillinER-Cre+	-1.757	-19.16 to 15.64	No	ns	0.9985
	Pycard–OvaFla+VillinER-Cre+ vs. Nlrc4–OvaFla+VillinER-Cre+	4.593	-12.25 to 21.44	No	ns	0.9394
	Pycard–OvaFla+VillinER-Cre+ vs. Cre only	4.701	-13.41 to 22.81	No	ns	0.9489
	Gsdmd–OvaFla+VillinER-Cre+ vs. Nlrc4–OvaFla+VillinER-Cre+	6.35	-10.50 to 23.20	No	ns	0.8265
	Gsdmd–OvaFla+VillinER-Cre+ vs. Cre only	6.458	-11.65 to 24.57	No	ns	0.8535
	Nlrc4–OvaFla+VillinER-Cre+ vs. Cre only	0.1083	-17.47 to 17.69	No	ns	>0.9999
	Spleen
	OvaFla+VillinER-Cre+ vs. Pycard–OvaFla+VillinER-Cre+	3.047	-13.80 to 19.89	No	ns	0.9863
	OvaFla+VillinER-Cre+ vs. Gsdmd–OvaFla+VillinER-Cre+	-7.273	-24.12 to 9.574	No	ns	0.7439
	OvaFla+VillinER-Cre+ vs. Nlrc4–OvaFla+VillinER-Cre+	-4.168	-20.44 to 12.11	No	ns	0.9513
	OvaFla+VillinER-Cre+ vs. Cre only	-2.84	-20.42 to 14.74	No	ns	0.991
	Pycard–OvaFla+VillinER-Cre+ vs. Gsdmd–OvaFla+VillinER-Cre+	-10.32	-27.72 to 7.080	No	ns	0.4619
	Pycard–OvaFla+VillinER-Cre+ vs. Nlrc4–OvaFla+VillinER-Cre+	-7.214	-24.06 to 9.633	No	ns	0.7495
	Pycard–OvaFla+VillinER-Cre+ vs. Cre only	-5.887	-24.00 to 12.22	No	ns	0.8907
	Gsdmd–OvaFla+VillinER-Cre+ vs. Nlrc4–OvaFla+VillinER-Cre+	3.106	-13.74 to 19.95	No	ns	0.9852
	Gsdmd–OvaFla+VillinER-Cre+ vs. Cre only	4.433	-13.68 to 22.54	No	ns	0.9584
	Nlrc4–OvaFla+VillinER-Cre+ vs. Cre only	1.327	-16.25 to 18.91	No	ns	0.9995
