# Supplementary material for: Inflammasome activation leads to cDC1-independent cross-priming of CD8 T cells by epithelial cell-derived antigen
Source: eLife. 2021 Dec 23;10:e72082. doi: 10.7554/eLife.72082 (PMC8719880; doi:10.7554/eLife.72082)
Supplement: Figure 5—figure supplement 4—source data 1. [file elife-72082-fig5-figsupp4-data1.xlsx]

## Sheet: A
	SPLEEN
	Šídák's multiple comparisons test	Mean Diff.	95.00% CI of diff.	Below threshold?	Summary	Adjusted P Value
	Bm1+OvaFla+VillinERCre+ (B6) vs.Bm1+OvaFla+VillinERCre+ (Batf3–)	1.768	-16.44 to 19.97	No	ns	0.9934
	Bm1+gsdmd–OvaFla+VillinER-Cre+ (B6) vs. Bm1+gsdmd–OvaFla+VillinER-Cre+ (Batf3–)	16.97	-7.296 to 41.23	No	ns	0.2485
	Bm1+Nlrc4–OvaFla–VillinERCre+ (B6) vs. Bm1+Nlrc4–OvaFla–VillinERCre+ (Batf3–)	5.958	-11.00 to 22.92	No	ns	0.7743
	MESENTERIC LYMPH NODE
	Šídák's multiple comparisons test	Mean Diff.	95.00% CI of diff.	Below threshold?	Summary	Adjusted P Value
	Bm1+OvaFla+VillinERCre+ (B6) vs.Bm1+OvaFla+VillinERCre+ (Batf3–)	-0.5873	-17.71 to 16.53	No	ns	0.9997
	Bm1+gsdmd–OvaFla+VillinER-Cre+ (B6) vs. Bm1+gsdmd–OvaFla+VillinER-Cre+ (Batf3–)	1.4	-17.64 to 20.44	No	ns	0.9971
	Bm1+Nlrc4–OvaFla–VillinERCre+ (B6) vs. Bm1+Nlrc4–OvaFla–VillinERCre+ (Batf3–)	-5.217	-21.99 to 11.56	No	ns	0.8324

## Sheet: B
	MESENTERIC LYMPH NODE
	Šídák's multiple comparisons test	Mean Diff.	95.00% CI of diff.	Below threshold?	Summary	Adjusted P Value
	Bm1+OvaFla+VillinERCre+ (B6) vs.Bm1+OvaFla+VillinERCre+ (Batf3–)	-0.3167	-12.14 to 11.50	No	ns	0.9998
	Bm1+gsdmd–OvaFla+VillinER-Cre+ (B6) vs. Bm1+gsdmd–OvaFla+VillinER-Cre+ (Batf3–)	-4.027	-16.89 to 8.839	No	ns	0.8214
	Bm1+Nlrc4–OvaFla–VillinERCre+ (B6) vs. Bm1+Nlrc4–OvaFla–VillinERCre+ (Batf3–)	6.733	-4.742 to 18.21	No	ns	0.3848
