# Supplementary material for: Inflammasome activation leads to cDC1-independent cross-priming of CD8 T cells by epithelial cell-derived antigen
Source: eLife. 2021 Dec 23;10:e72082. doi: 10.7554/eLife.72082 (PMC8719880; doi:10.7554/eLife.72082)
Supplement: Figure 5—source data 1. [file elife-72082-fig5-data1.xlsx]

## Sheet: A
	Šídák's multiple comparisons test	Mean Diff.	95.00% CI of diff.	Below threshold?	Summary	Adjusted P Value
	Bm1+OvaFla+VillinERCre+ (B6) vs.Bm1+OvaFla+VillinERCre+ (Batf3–)	0.5153	0.3354 to 0.6951	Yes	****	<0.0001
	Bm1+gsdmd–OvaFla+VillinER-Cre+ (B6) vs. Bm1+gsdmd–OvaFla+VillinER-Cre+ (Batf3–)	0.3284	0.1342 to 0.5227	Yes	***	0.0007
	Bm1+Nlrc4–OvaFla–VillinERCre+ (B6) vs. Bm1+Nlrc4–OvaFla–VillinERCre+ (Batf3–)	0.585	0.4052 to 0.7649	Yes	****	<0.0001

## Sheet: B
	TOP
	Šídák's multiple comparisons test	Mean Diff.	95.00% CI of diff.	Below threshold?	Summary	Adjusted P Value
	Bm1+OvaFla+VillinERCre+ (B6) vs.Bm1+OvaFla+VillinERCre+ (Batf3–)	0.1216	-0.06406 to 0.3073	No	ns	0.303
	Bm1+gsdmd–OvaFla+VillinER-Cre+ (B6) vs. Bm1+gsdmd–OvaFla+VillinER-Cre+ (Batf3–)	0.1837	-0.01322 to 0.3806	No	ns	0.0746
	Bm1+Nlrc4–OvaFla–VillinERCre+ (B6) vs. Bm1+Nlrc4–OvaFla–VillinERCre+ (Batf3–)	0.4622	0.2844 to 0.6399	Yes	****	<0.0001
	MIDDLE
	Šídák's multiple comparisons test	Mean Diff.	95.00% CI of diff.	Below threshold?	Summary	Adjusted P Value
	Bm1+OvaFla+VillinERCre+ (B6) vs.Bm1+OvaFla+VillinERCre+ (Batf3–)	3241	-3554 to 10036	No	ns	0.5725
	Bm1+gsdmd–OvaFla+VillinER-Cre+ (B6) vs. Bm1+gsdmd–OvaFla+VillinER-Cre+ (Batf3–)	7448	241.0 to 14655	Yes	*	0.0407
	Bm1+Nlrc4–OvaFla–VillinERCre+ (B6) vs. Bm1+Nlrc4–OvaFla–VillinERCre+ (Batf3–)	16403	9764 to 23041	Yes	****	<0.0001
	BOTTOM
	Šídák's multiple comparisons test	Mean Diff.	95.00% CI of diff.	Below threshold?	Summary	Adjusted P Value
	Bm1+OvaFla+VillinERCre+ (B6) vs.Bm1+OvaFla+VillinERCre+ (Batf3–)	2262	-3513 to 8037	No	ns	0.7121
	Bm1+gsdmd–OvaFla+VillinER-Cre+ (B6) vs. Bm1+gsdmd–OvaFla+VillinER-Cre+ (Batf3–)	3606	-4302 to 11513	No	ns	0.6062
	Bm1+Nlrc4–OvaFla–VillinERCre+ (B6) vs. Bm1+Nlrc4–OvaFla–VillinERCre+ (Batf3–)	12314	6672 to 17956	Yes	****	<0.0001

## Sheet: C
	TOP
	Šídák's multiple comparisons test	Mean Diff.	95.00% CI of diff.	Below threshold?	Summary	Adjusted P Value
	Bm1+OvaFla+VillinERCre+ (B6) vs.Bm1+OvaFla+VillinERCre+ (Batf3–)	0.109	-0.2297 to 0.4477	No	ns	0.8181
	Bm1+gsdmd–OvaFla+VillinER-Cre+ (B6) vs. Bm1+gsdmd–OvaFla+VillinER-Cre+ (Batf3–)	0.09795	-0.2698 to 0.4657	No	ns	0.8869
	Bm1+Nlrc4–OvaFla–VillinERCre+ (B6) vs. Bm1+Nlrc4–OvaFla–VillinERCre+ (Batf3–)	0.4967	0.1647 to 0.8286	Yes	**	0.0015
	MIDDLE
	Šídák's multiple comparisons test	Mean Diff.	95.00% CI of diff.	Below threshold?	Summary	Adjusted P Value
	Bm1+OvaFla+VillinERCre+ (B6) vs.Bm1+OvaFla+VillinERCre+ (Batf3–)	3332	-4827 to 11492	No	ns	0.6867
	Bm1+gsdmd–OvaFla+VillinER-Cre+ (B6) vs. Bm1+gsdmd–OvaFla+VillinER-Cre+ (Batf3–)	5413	-3445 to 14271	No	ns	0.3622
	Bm1+Nlrc4–OvaFla–VillinERCre+ (B6) vs. Bm1+Nlrc4–OvaFla–VillinERCre+ (Batf3–)	12447	4452 to 20443	Yes	***	0.0009
	BOTTOM
	Šídák's multiple comparisons test	Mean Diff.	95.00% CI of diff.	Below threshold?	Summary	Adjusted P Value
	Bm1+OvaFla+VillinERCre+ (B6) vs.Bm1+OvaFla+VillinERCre+ (Batf3–)	1641	-1923 to 5206	No	ns	0.6004
	Bm1+gsdmd–OvaFla+VillinER-Cre+ (B6) vs. Bm1+gsdmd–OvaFla+VillinER-Cre+ (Batf3–)	1353	-2612 to 5317	No	ns	0.7907
	Bm1+Nlrc4–OvaFla–VillinERCre+ (B6) vs. Bm1+Nlrc4–OvaFla–VillinERCre+ (Batf3–)	4736	1243 to 8230	Yes	**	0.0044

## Sheet: D
	SPLEEN
	Šídák's multiple comparisons test	Mean Diff.	95.00% CI of diff.	Below threshold?	Summary	Adjusted P Value
	Bm1+OvaFla+VillinERCre+ (B6) vs.Bm1+OvaFla+VillinERCre+ (Batf3–)	13.89	-0.1106 to 27.90	No	ns	0.0524
	Bm1+gsdmd–OvaFla+VillinER-Cre+ (B6) vs. Bm1+gsdmd–OvaFla+VillinER-Cre+ (Batf3–)	48.81	30.15 to 67.48	Yes	****	<0.0001
	Bm1+Nlrc4–OvaFla–VillinERCre+ (B6) vs. Bm1+Nlrc4–OvaFla–VillinERCre+ (Batf3–)	42.56	27.55 to 57.58	Yes	****	<0.0001
	MESENTERIC LYMPH NODE
	Šídák's multiple comparisons test	Mean Diff.	95.00% CI of diff.	Below threshold?	Summary	Adjusted P Value
	Bm1+OvaFla+VillinERCre+ (B6) vs.Bm1+OvaFla+VillinERCre+ (Batf3–)	1.768	-16.44 to 19.97	No	ns	0.9934
	Bm1+gsdmd–OvaFla+VillinER-Cre+ (B6) vs. Bm1+gsdmd–OvaFla+VillinER-Cre+ (Batf3–)	16.97	-7.296 to 41.23	No	ns	0.2485
	Bm1+Nlrc4–OvaFla–VillinERCre+ (B6) vs. Bm1+Nlrc4–OvaFla–VillinERCre+ (Batf3–)	5.958	-11.00 to 22.92	No	ns	0.7743

## Sheet: E
	MESENTERIC LYMPH NODE
	Šídák's multiple comparisons test	Mean Diff.	95.00% CI of diff.	Below threshold?	Summary	Adjusted P Value
	Bm1+OvaFla+VillinERCre+ (B6) vs.Bm1+OvaFla+VillinERCre+ (Batf3–)	428	-861.3 to 1717	No	ns	0.797
	Bm1+gsdmd–OvaFla+VillinER-Cre+ (B6) vs. Bm1+gsdmd–OvaFla+VillinER-Cre+ (Batf3–)	361	-1042 to 1764	No	ns	0.8924
	Bm1+Nlrc4–OvaFla–VillinERCre+ (B6) vs. Bm1+Nlrc4–OvaFla–VillinERCre+ (Batf3–)	2295	1043 to 3546	Yes	***	0.0001
