# Supplementary material for: Inflammasome activation leads to cDC1-independent cross-priming of CD8 T cells by epithelial cell-derived antigen
Source: eLife. 2021 Dec 23;10:e72082. doi: 10.7554/eLife.72082 (PMC8719880; doi:10.7554/eLife.72082)
Supplement: Figure 6—figure supplement 2—source data 1. [file elife-72082-fig6-figsupp2-data1.xlsx]

## Sheet: Experiment 1
	LEFT
	Šídák's multiple comparisons test	Mean Diff.	95.00% CI of diff.	Below threshold?	Summary	Adjusted P Value
	Bm1+OvaFla+VillinER-Cre+ (B6) vs. Bm1+OvaFla+VillinER-Cre+ (Zbtb46–)	0.1498	0.07739 to 0.2221	Yes	***	0.0001
	Bm1+Gsdmd–OvaFla+VillinER-Cre+(B6) vs. Bm1+Gsdmd–OvaFla+VillinER-Cre+(Zbtb46–)	0.1696	0.09484 to 0.2443	Yes	****	<0.0001
	Bm1+Nlrc4–OvaFla+VillinER-Cre+ (B6) vs. Bm1+Nlrc4–OvaFla+VillinER-Cre+ (Zbtb46–)	0.159	0.08664 to 0.2314	Yes	****	<0.0001
	RIGHT
	Šídák's multiple comparisons test	Mean Diff.	95.00% CI of diff.	Below threshold?	Summary	Adjusted P Value
	Bm1+OvaFla+VillinER-Cre+ (B6) vs. Bm1+OvaFla+VillinER-Cre+ (Zbtb46–)	0.07903	0.02123 to 0.1368	Yes	**	0.0062
	Bm1+Gsdmd–OvaFla+VillinER-Cre+(B6) vs. Bm1+Gsdmd–OvaFla+VillinER-Cre+(Zbtb46–)	0.1159	0.05621 to 0.1756	Yes	***	0.0002
	Bm1+Nlrc4–OvaFla+VillinER-Cre+ (B6) vs. Bm1+Nlrc4–OvaFla+VillinER-Cre+ (Zbtb46–)	0.07253	0.01473 to 0.1303	Yes	*	0.0118

## Sheet: Experiment 2
	LEFT
	Šídák's multiple comparisons test	Mean Diff.	95.00% CI of diff.	Below threshold?	Summary	Adjusted P Value
	Bm1+OvaFla+VillinER-Cre+ (B6) vs. Bm1+OvaFla+VillinER-Cre+ (Zbtb46–)	0.5886	0.1335 to 1.044	Yes	**	0.0093
	Bm1+Gsdmd–OvaFla+VillinER-Cre+(B6) vs. Bm1+Gsdmd–OvaFla+VillinER-Cre+(Zbtb46–)	0.7468	0.3860 to 1.108	Yes	****	<0.0001
	Bm1+Nlrc4–OvaFla+VillinER-Cre+ (B6) vs. Bm1+Nlrc4–OvaFla+VillinER-Cre+ (Zbtb46–)	0.6733	0.2181 to 1.128	Yes	**	0.0031
	RIGHT
	Šídák's multiple comparisons test	Mean Diff.	95.00% CI of diff.	Below threshold?	Summary	Adjusted P Value
	Bm1+OvaFla+VillinER-Cre+ (B6) vs. Bm1+OvaFla+VillinER-Cre+ (Zbtb46–)	0.2694	0.1094 to 0.4294	Yes	***	0.0009
	Bm1+Gsdmd–OvaFla+VillinER-Cre+(B6) vs. Bm1+Gsdmd–OvaFla+VillinER-Cre+(Zbtb46–)	0.373	0.2461 to 0.4999	Yes	****	<0.0001
	Bm1+Nlrc4–OvaFla+VillinER-Cre+ (B6) vs. Bm1+Nlrc4–OvaFla+VillinER-Cre+ (Zbtb46–)	0.2603	0.1003 to 0.4203	Yes	**	0.0013
