# Supplementary material for: Inflammasome activation leads to cDC1-independent cross-priming of CD8 T cells by epithelial cell-derived antigen
Source: eLife. 2021 Dec 23;10:e72082. doi: 10.7554/eLife.72082 (PMC8719880; doi:10.7554/eLife.72082)
Supplement: Figure 6—source data 1. [file elife-72082-fig6-data1.xlsx]

## Sheet: A
	TOP
	Šídák's multiple comparisons test	Mean Diff.	95.00% CI of diff.	Below threshold?	Summary	Adjusted P Value
	Bm1+OvaFla+VillinER-Cre+ (B6) vs. Bm1+OvaFla+VillinER-Cre+ (Zbtb46–)	0.4251	0.02483 to 0.8253	Yes	*	0.0341
	Bm1+Gsdmd–OvaFla+VillinER-Cre+(B6) vs. Bm1+Gsdmd–OvaFla+VillinER-Cre+(Zbtb46–)	0.8421	0.4891 to 1.195	Yes	****	<0.0001
	Bm1+Nlrc4–OvaFla+VillinER-Cre+ (B6) vs. Bm1+Nlrc4–OvaFla+VillinER-Cre+ (Zbtb46–)	0.6791	0.2916 to 1.067	Yes	***	0.0002
	BOTTOM
	Šídák's multiple comparisons test	Mean Diff.	95.00% CI of diff.	Below threshold?	Summary	Adjusted P Value
	Bm1+OvaFla+VillinER-Cre+ (B6) vs. Bm1+OvaFla+VillinER-Cre+ (Zbtb46–)	16923	2359 to 31487	Yes	*	0.0181
	Bm1+Gsdmd–OvaFla+VillinER-Cre+(B6) vs. Bm1+Gsdmd–OvaFla+VillinER-Cre+(Zbtb46–)	46635	30137 to 63134	Yes	****	<0.0001
	Bm1+Nlrc4–OvaFla+VillinER-Cre+ (B6) vs. Bm1+Nlrc4–OvaFla+VillinER-Cre+ (Zbtb46–)	26837	12736 to 40939	Yes	****	<0.0001

## Sheet: B
	TOP
	Šídák's multiple comparisons test	Mean Diff.	95.00% CI of diff.	Below threshold?	Summary	Adjusted P Value
	Bm1+OvaFla+VillinER-Cre+ (B6) vs. Bm1+OvaFla+VillinER-Cre+ (Zbtb46–)	0.5991	0.2880 to 0.9102	Yes	****	<0.0001
	Bm1+Gsdmd–OvaFla+VillinER-Cre+(B6) vs. Bm1+Gsdmd–OvaFla+VillinER-Cre+(Zbtb46–)	0.3636	0.07146 to 0.6557	Yes	*	0.0102
	Bm1+Nlrc4–OvaFla+VillinER-Cre+ (B6) vs. Bm1+Nlrc4–OvaFla+VillinER-Cre+ (Zbtb46–)	1.022	0.7107 to 1.333	Yes	****	<0.0001
	BOTTOM
	Šídák's multiple comparisons test	Mean Diff.	95.00% CI of diff.	Below threshold?	Summary	Adjusted P Value
	Bm1+OvaFla+VillinER-Cre+ (B6) vs. Bm1+OvaFla+VillinER-Cre+ (Zbtb46–)	7943	2959 to 12927	Yes	***	0.0008
	Bm1+Gsdmd–OvaFla+VillinER-Cre+(B6) vs. Bm1+Gsdmd–OvaFla+VillinER-Cre+(Zbtb46–)	3939	-740.1 to 8618	No	ns	0.1227
	Bm1+Nlrc4–OvaFla+VillinER-Cre+ (B6) vs. Bm1+Nlrc4–OvaFla+VillinER-Cre+ (Zbtb46–)	12851	7867 to 17835	Yes	****	<0.0001
