# Supplementary material for: Inflammasome activation leads to cDC1-independent cross-priming of CD8 T cells by epithelial cell-derived antigen
Source: eLife journal article supplement (doi:10.7554/elife.72082), 2021-12-22

**Donor: B6 (H-2K<sup>b</sup>) Recipient: WT OvaFla (H-2K<sup>bm1</sup>)**

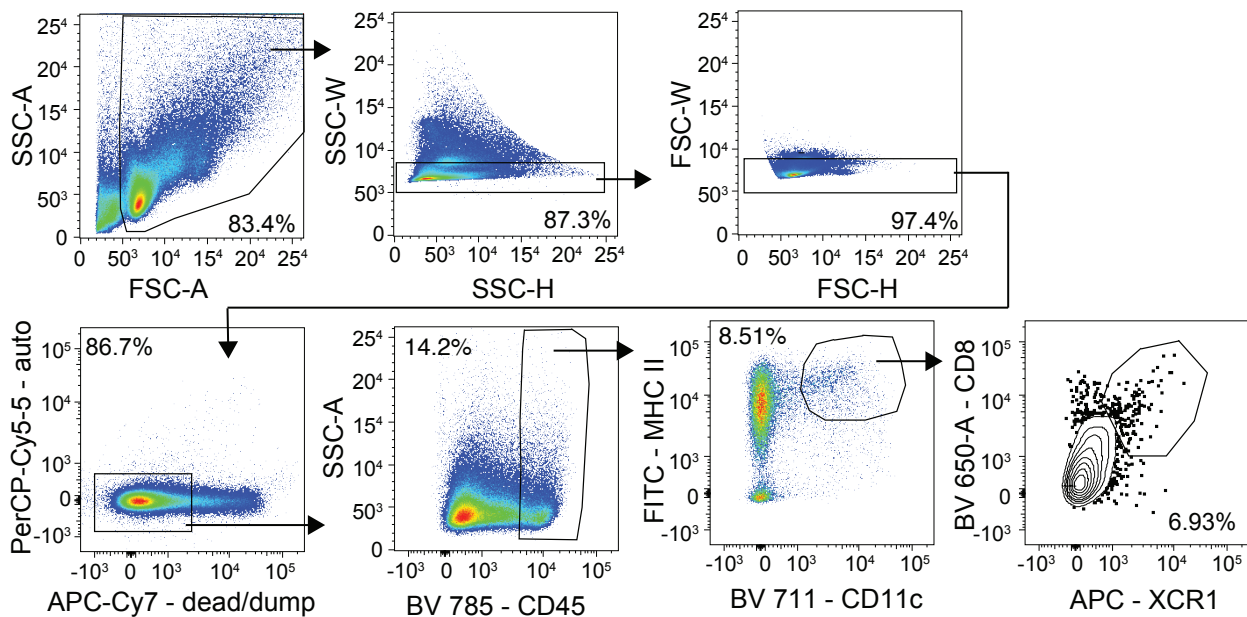

**Donor: *Batf3*<sup>-/-</sup> (H-2K<sup>b</sup>) Recipient: WT OvaFla (H-2K<sup>bm1</sup>)**

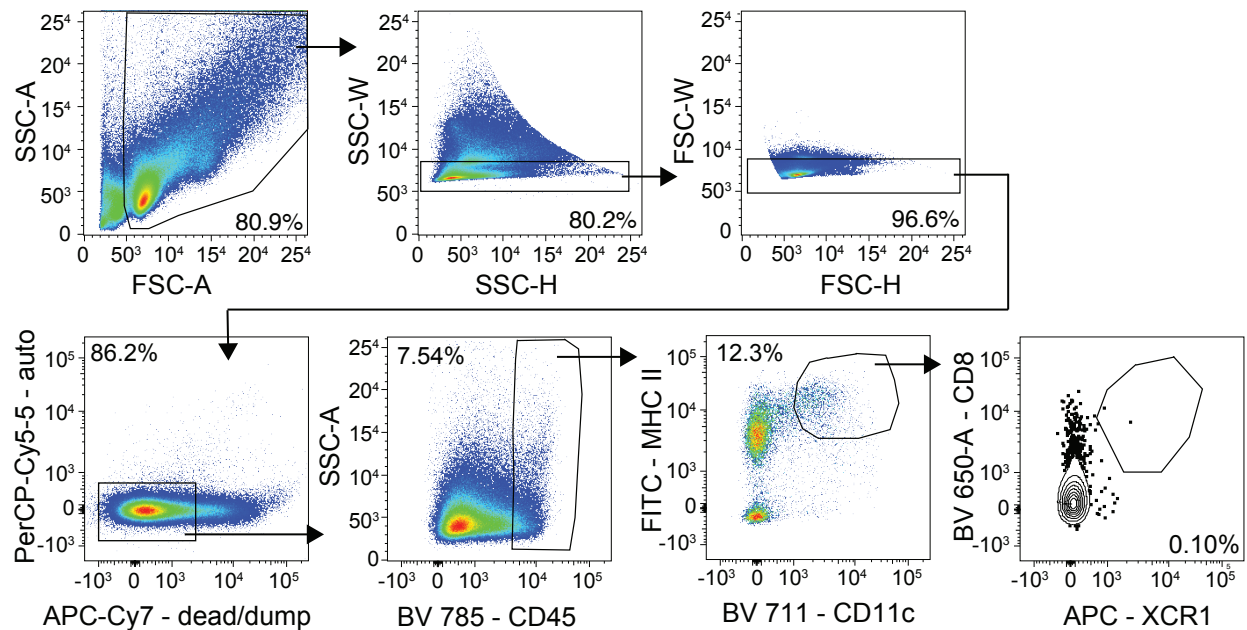

Supplement: supp [file elife_poa_e72082_Figure_5_figure_supplement_2.pdf › elife_poa_e72082_Figure_5_figure_supplement_2.pdf]
