# Supplementary material for: Inflammasome activation leads to cDC1-independent cross-priming of CD8 T cells by epithelial cell-derived antigen
Source: eLife journal article supplement (doi:10.7554/elife.72082), 2021-12-22

**Donor: B6 (*Zbtb46*<sup>+</sup>) Recipient: WT OvaFla (H-2K<sup>bm1</sup>)**

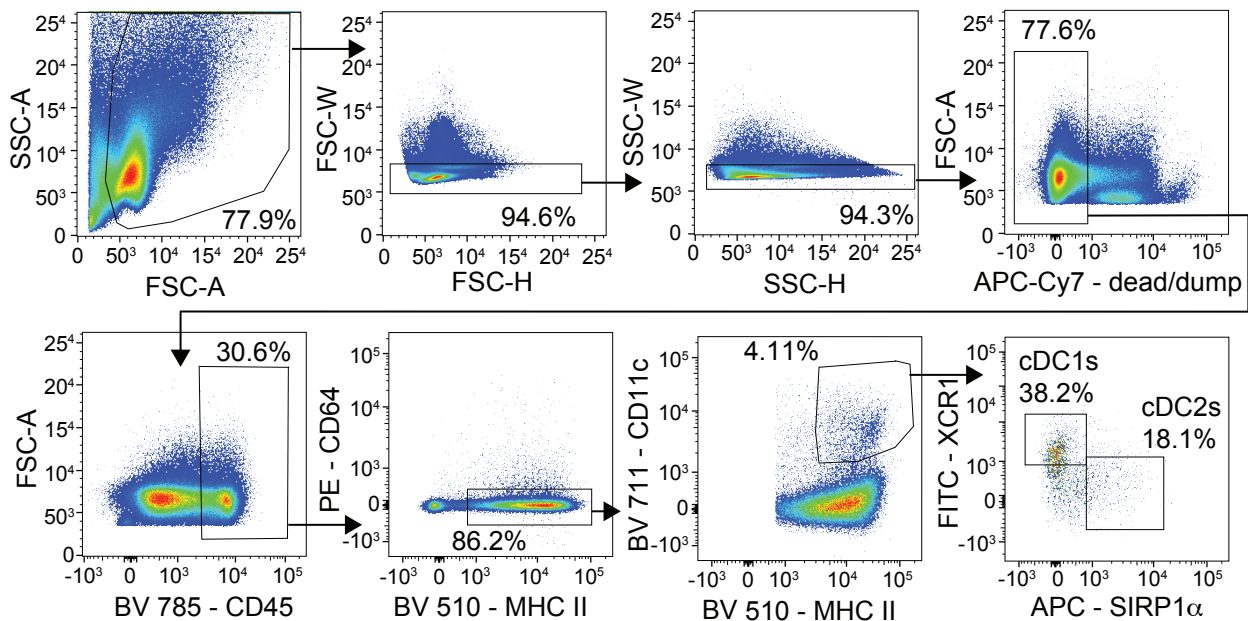

**Donor: *Zbtb46*-DTR Recipient: WT OvaFla (H-2K<sup>bm1</sup>)**

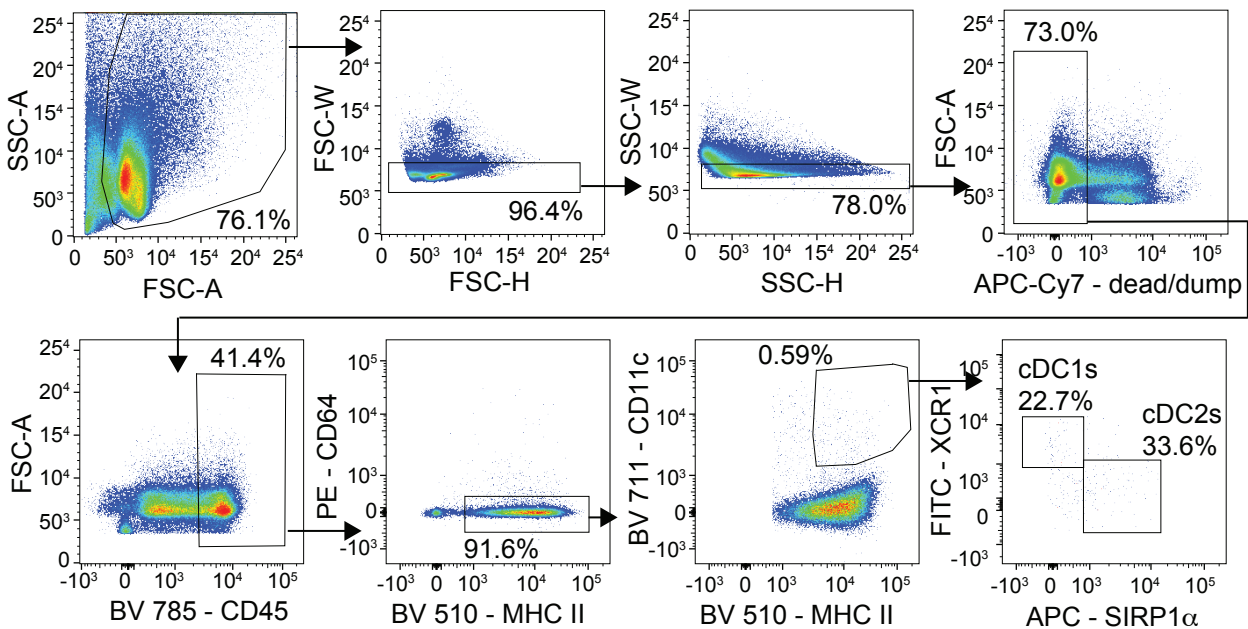

Supplement: supp [file elife_poa_e72082_Figure_6_figure_supplement_1.pdf › elife_poa_e72082_Figure_6_figure_supplement_1.pdf]
