# Supplementary figures and images for: Inflammasome activation leads to cDC1-independent cross-priming of CD8 T cells by epithelial cell-derived antigen
Source: eLife journal article supplement (doi:10.7554/elife.72082), 2021-12-22

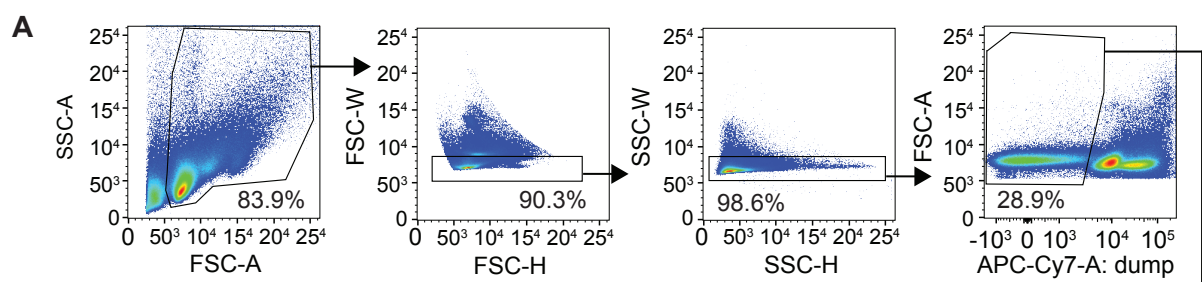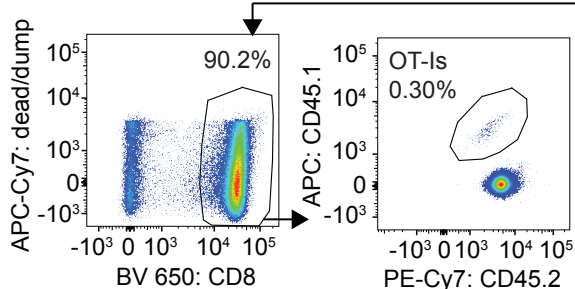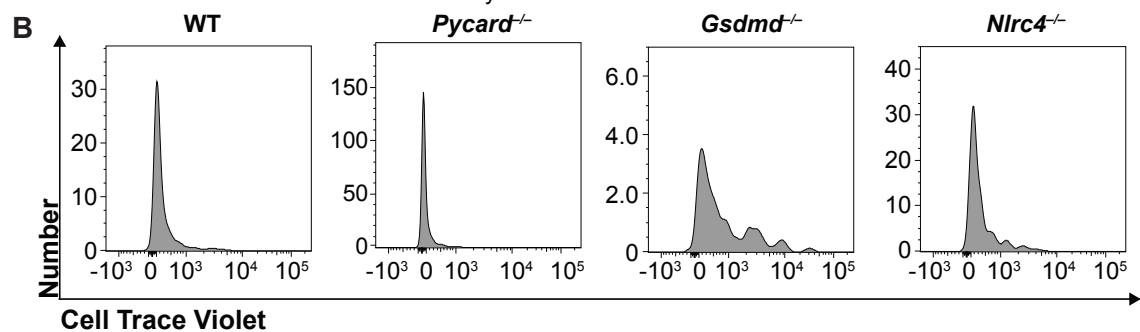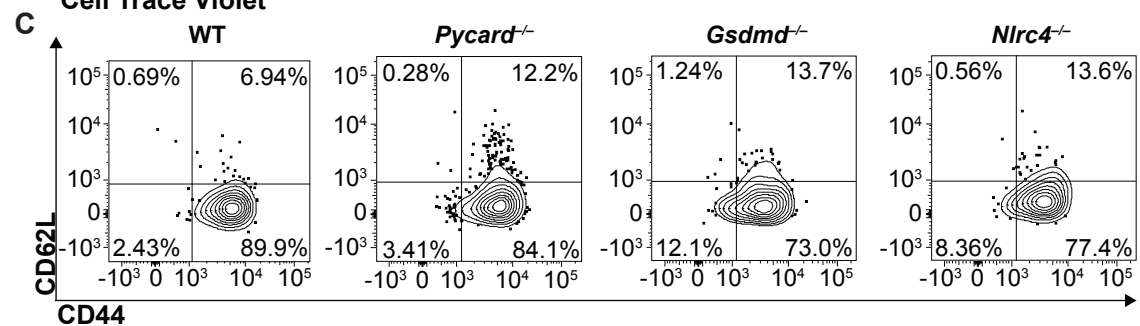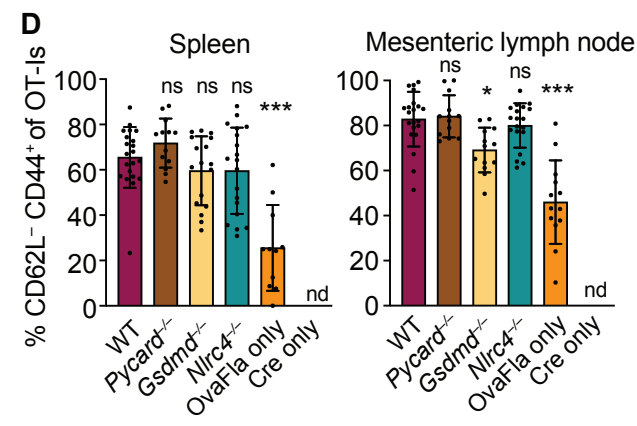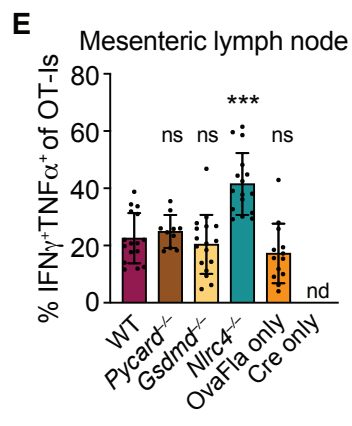

Supplement: supp [file elife_poa_e72082_Figure_3_figure_supplement_1.pdf › elife_poa_e72082_Figure_3_figure_supplement_1.pdf]

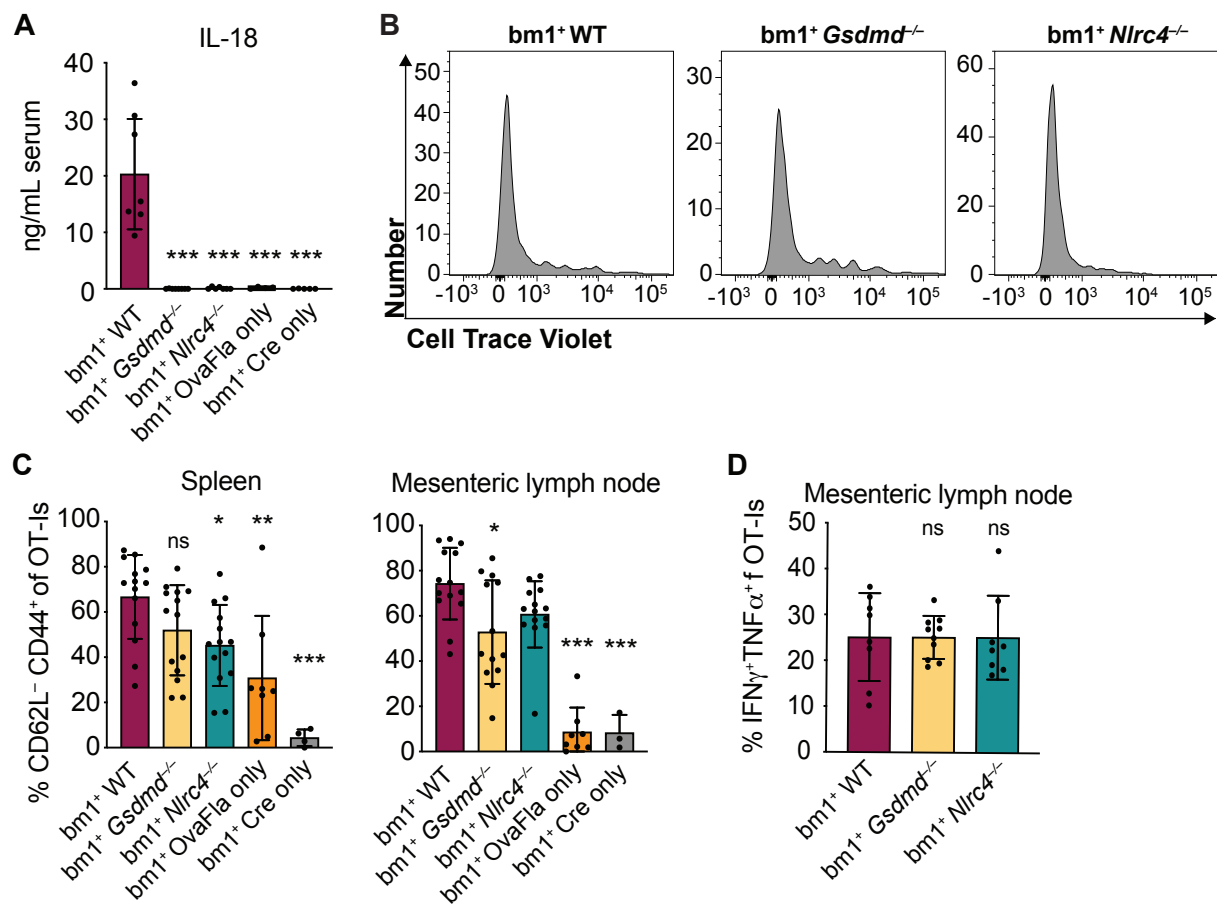

Supplement: supp [file elife_poa_e72082_Figure_4_figure_supplement_1.pdf › elife_poa_e72082_Figure_4_figure_supplement_1.pdf]

**A**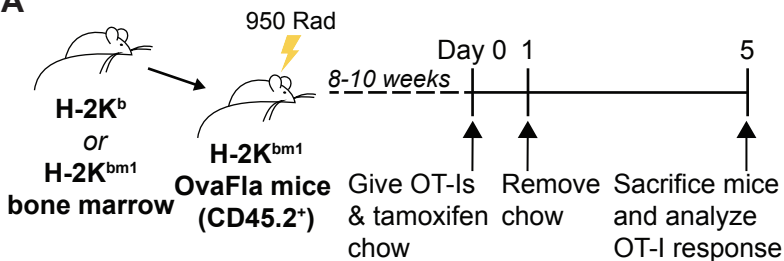**B**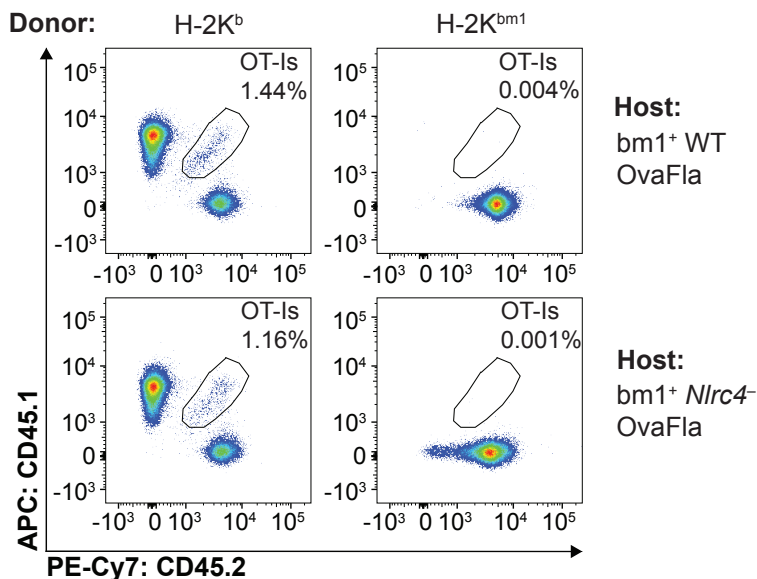**C**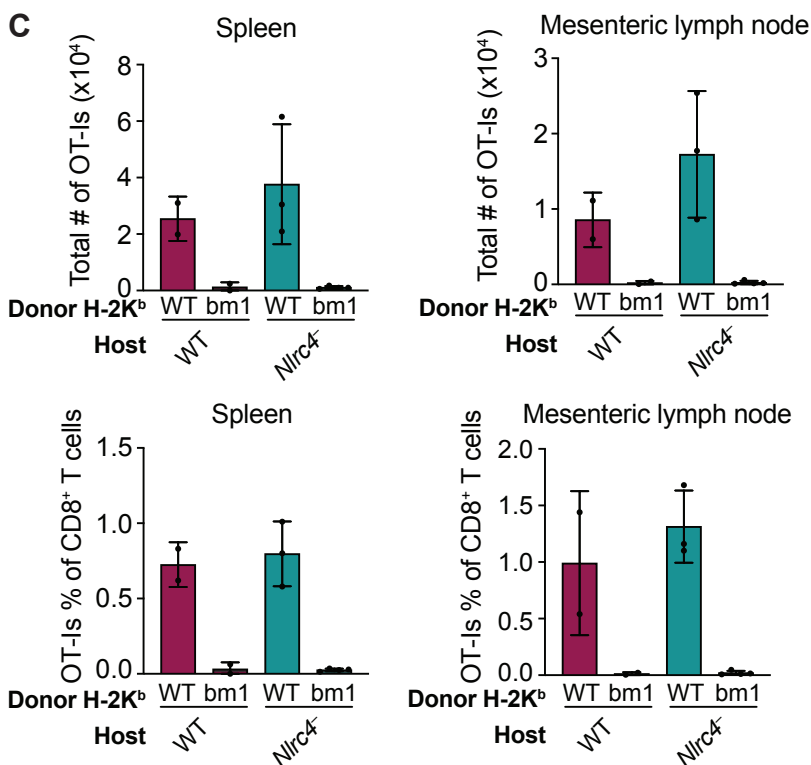

Supplement: supp [file elife_poa_e72082_Figure_4_figure_supplement_2.pdf › elife_poa_e72082_Figure_4_figure_supplement_2.pdf]

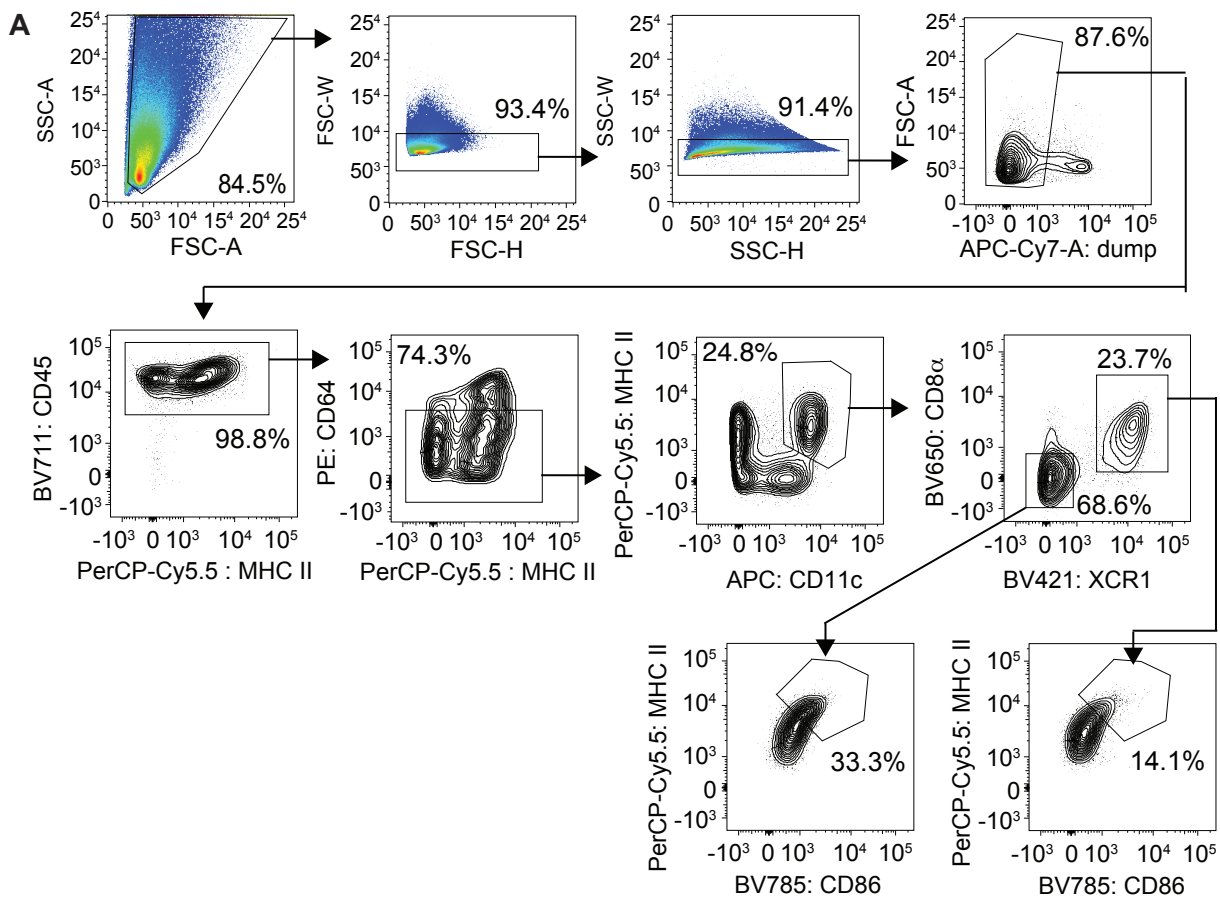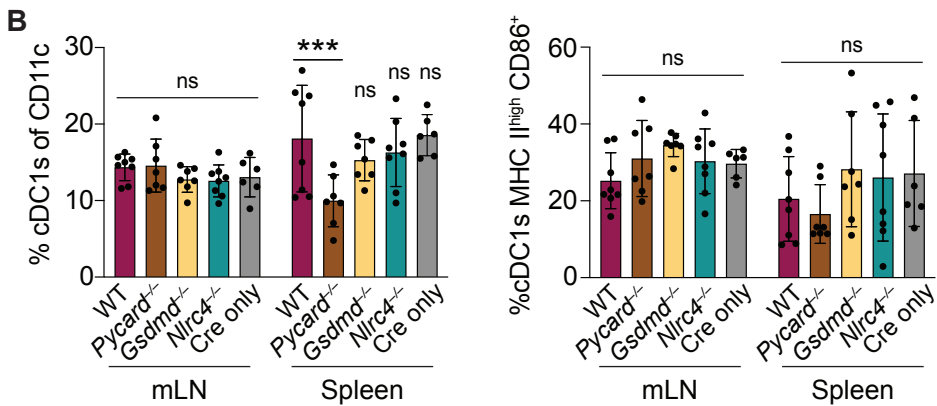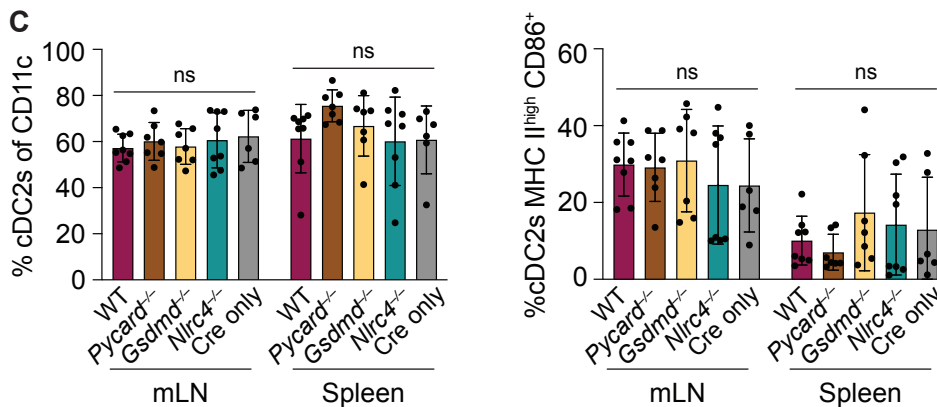

Supplement: supp [file elife_poa_e72082_Figure_5_figure_supplement_1.pdf › elife_poa_e72082_Figure_5_figure_supplement_1.pdf]

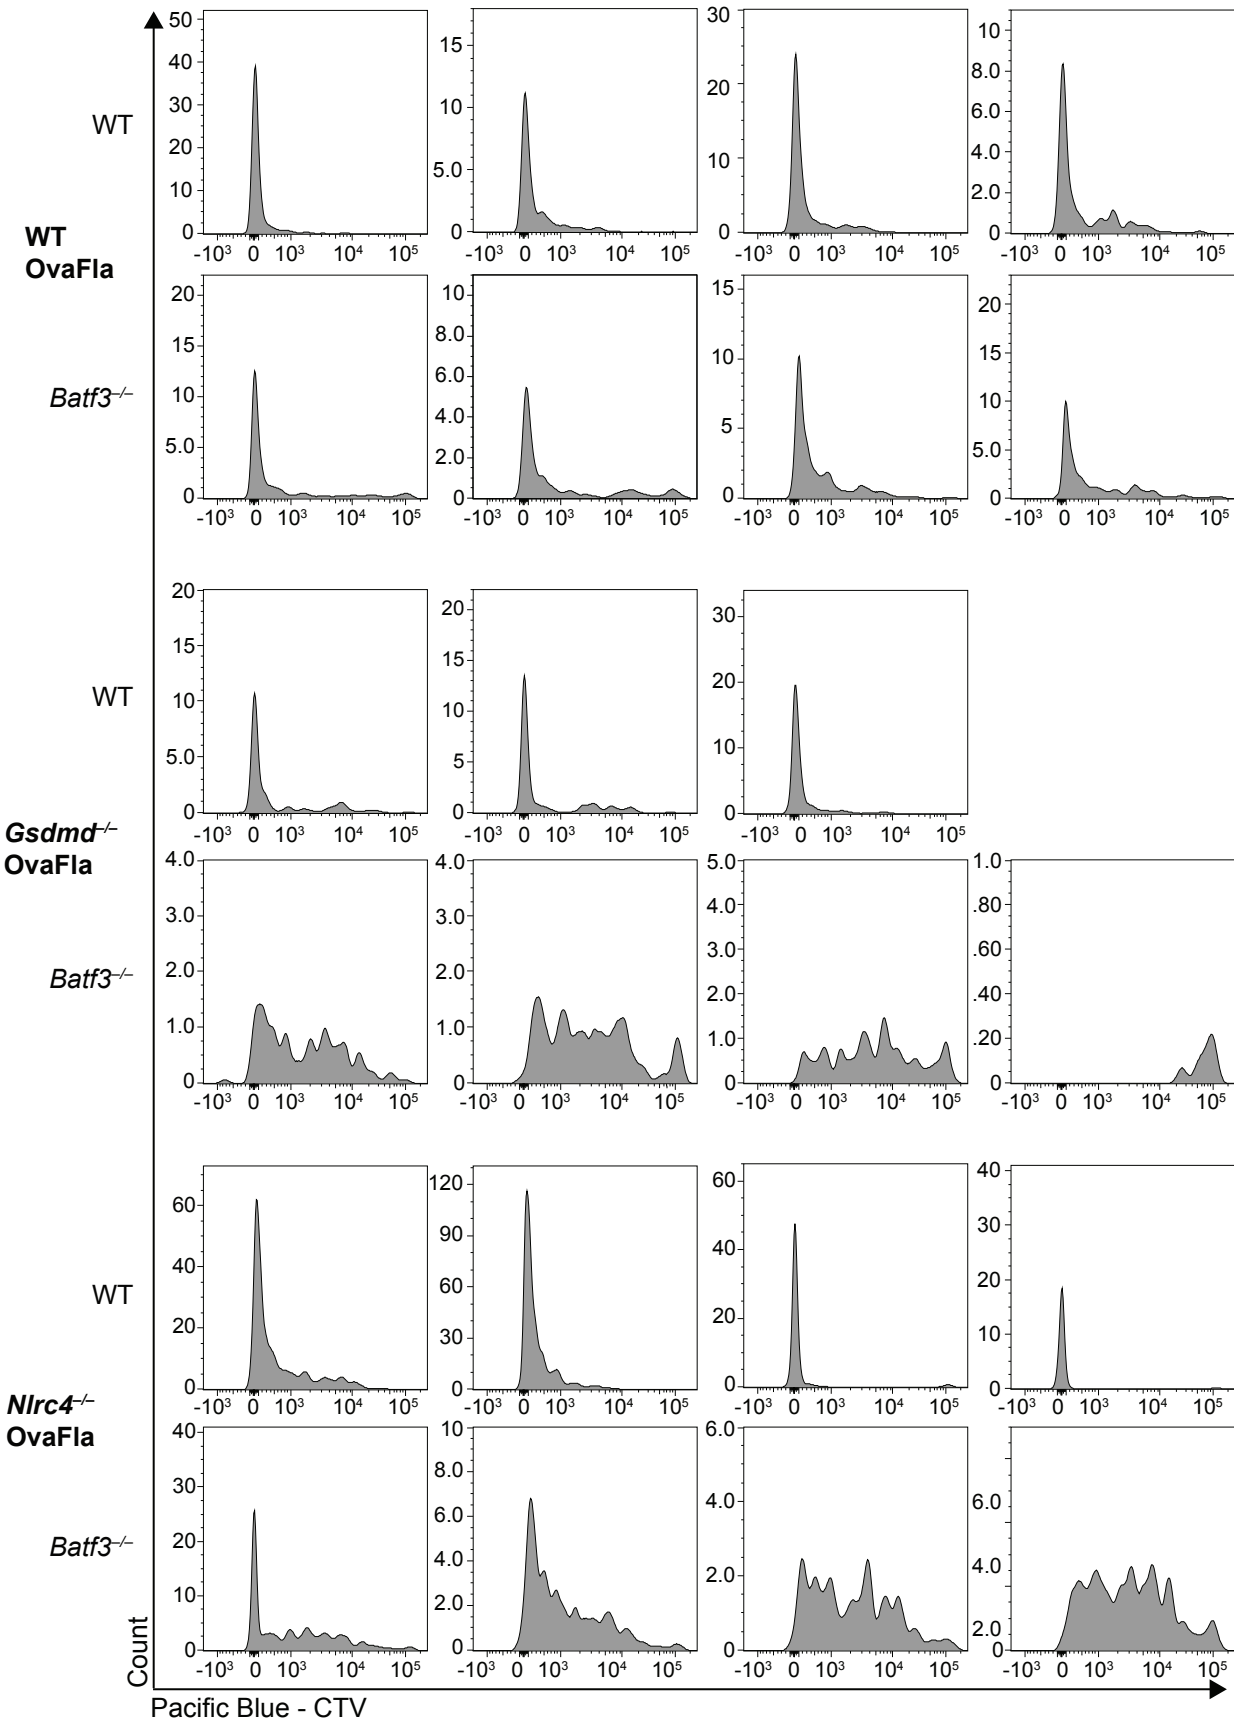

Supplement: supp [file elife_poa_e72082_Figure_5_figure_supplement_3.pdf › elife_poa_e72082_Figure_5_figure_supplement_3.pdf]

**A**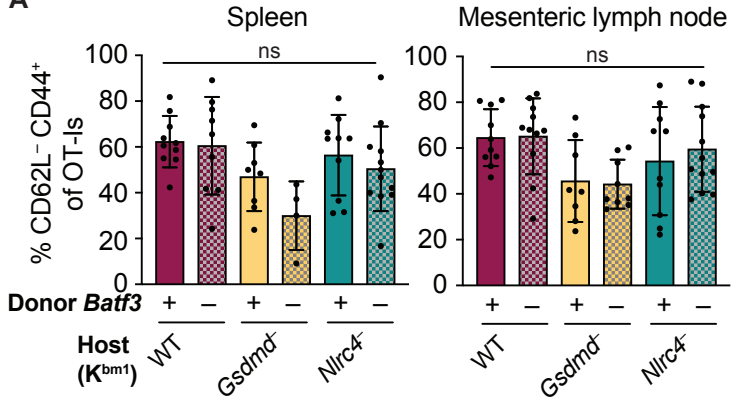**B**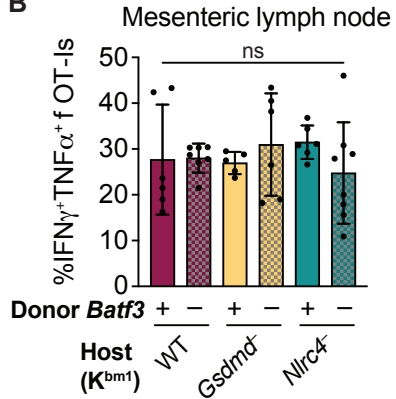

Supplement: supp [file elife_poa_e72082_Figure_5_figure_supplement_4.pdf › elife_poa_e72082_Figure_5_figure_supplement_4.pdf]

## Experiment 1

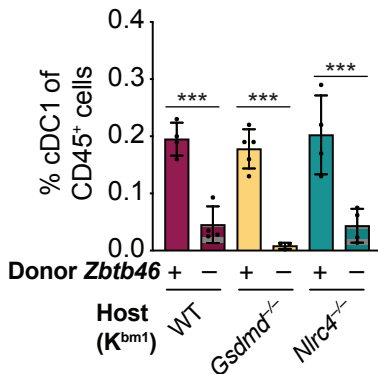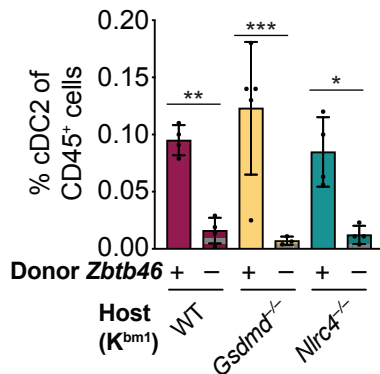

## Experiment 2

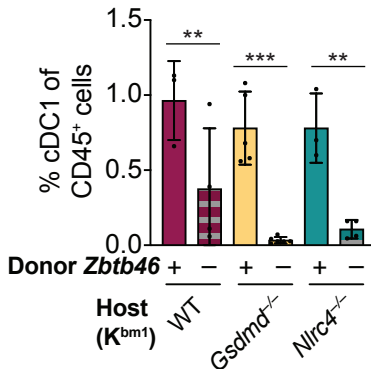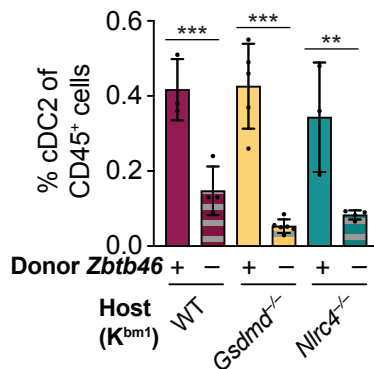

Supplement: supp [file elife_poa_e72082_Figure_6_figure_supplement_2.pdf › elife_poa_e72082_Figure_6_figure_supplement_2.pdf]
